# Supplementary material for: Planar chiral [2.2]paracyclophanyl-based boron fluoride complexes: synthesis, crystal structure and photophysical properties
Source: Royal Society of Chemistry journal article supplement (doi:10.1039/d1dt02231h), 2021-01-01
Supplement: d1dt02231h1.pdf [file d1dt02231h1.pdf]

## Supporting Information

*for*

### **Planar chiral [2.2]paracyclophanyl-based boron fluoride complexes: synthesis, crystal structure and photophysical properties**

Wenzeng Duan<sup>\*,a</sup> Honghan Ji,<sup>a</sup> Zeren Yang,<sup>a</sup> Qingxia Yao,<sup>a</sup> Yanmin Huo,<sup>a</sup> Xuerui Ren,<sup>a</sup>  
Jiaojiao Zhao,<sup>a</sup> Shuwen Gong<sup>\*,a</sup>

<sup>a</sup>Institute of Functional Organic Molecules and Materials, School of Chemistry and Chemical Engineering, Liaocheng University, No.1 Hunan Road, Liaocheng, 252000, China; E-mail: [duanwenzeng@lcu.edu.cn](mailto:duanwenzeng@lcu.edu.cn); [gongshw@lcu.edu.cn](mailto:gongshw@lcu.edu.cn)

#### **Table of contents**

|                                   |     |
|-----------------------------------|-----|
| 1. Experimental section.....      | S2  |
| 2. Spectroscopic Properties ..... | S6  |
| 3. NMR spectra.....               | S11 |
| 4. Theoretical calculations.....  | S27 |

## 1. Experimental section

### Materials and measurements

All the solvents were of analytical grade. Column flash chromatography was carried out on silica gel (200–400 mesh). Thin-layer chromatography (TLC) was performed on *silica gel GF254*. The fluorescence spectra were measured on a *F-4600 spectrofluorimeter (Hitachi, Japan)* luminescence spectrophotometer (the pathlength of the quartz cell is 1 cm) with a xenon arc lamp as the light source. Absorbance spectra measurements were performed on a *T9CS UV-vis spectrophotometer (Persee Instrument Co., Ltd. Beijing, China)*.  $^1\text{H}$  and  $^{13}\text{C}$  NMR spectra were recorded on a *Varian Mercury-plus 400MHz spectrometer* and a *Bruker AVANCE NEO 500 MHz spectrometer* and referenced to the residual proton signals of the solvent. HRMS spectra were recorded on an *Agilent 100 ABI-API4000 spectrometer*. X-ray data were collected on *Bruker Smart APEX II CCD diffractometer*. Ground-state geometry optimizations were performed by DFT by using the B3LYP functional and 6-31G(d) basis sets of the Gaussian 09 software package. The polarized continuum model (PCM) was used to provide an THF solvation environment.

### Synthesis procedures

Complexes  $(R_p, R)/(S_p, R)$ -**3a**;  $(R_p)/(S_p)$ -**3b**;  $(R_p, S)/(S_p, S)$ -**3c** and  $(R_p)/(S_p)$ -**3d** were readily prepared according to Scheme 1.

The resolution of  $(R_p)/(S_p)$ -**1**.<sup>1-2</sup>

Compound **1<sup>3</sup>** (3.75 mmol) was dissolved in dry toluene (10 mL), and  $(R)$ - $\alpha$ -phenylethylamine (4 mmol) was added at room temperature and refluxed at 150 °C for 16 hours. After cooling to temperature, the reaction solvent was removed by rotary evaporation. The crude material was resolution by column chromatography on silica gel (eluent: from petroleum ether/ $\text{CH}_2\text{Cl}_2$  = 1:3 to  $\text{CH}_2\text{Cl}_2$ /ethyl acetate = 20:1) to give compounds  $(R_p, R)$ -**2a** (yield: 37%) and  $(S_p, R)$ -**2a** (yield: 32%).

$(R_p, R)$ -**2a**:  $^1\text{H}$  NMR (400 MHz,  $\text{CDCl}_3$ )  $\delta$  15.98 (s, 1H), 7.58 – 7.52 (m, 1H), 7.47 (t,  $J$  = 7.7 Hz, 1H), 7.41 – 7.32 (m, 2H), 7.27 (dt,  $J$  = 5.7, 2.8 Hz, 1H), 7.06 (ddd,  $J$  = 18.7, 7.7, 1.9 Hz, 1H), 6.62 (ddd,  $J$  = 21.8, 7.9, 2.0 Hz, 1H), 6.55 – 6.40 (m, 3H), 6.21 (dd,  $J$  = 7.5, 5.8 Hz, 1H), 4.90 (dq,  $J$  = 8.5, 6.6 Hz, 1H), 3.54 – 3.35 (m, 1H), 3.32 – 2.80 (m, 5H), 2.71 – 2.50 (m, 2H), 2.29 (d,  $J$  = 3.8 Hz, 3H), 1.74 (dd,  $J$  = 28.2, 6.6 Hz, 3H);  $^{13}\text{C}$  NMR (126 MHz,  $\text{CDCl}_3$ )  $\delta$  170.33, 163.31, 143.72, 140.77, 140.05, 137.59, 136.13, 132.74, 131.43, 129.66, 129.56, 128.83, 127.17, 127.14, 126.25, 125.60, 122.20, 58.17, 37.36, 35.46, 33.89, 30.46, 25.43, 20.46; HRMS(ESI): calcd:  $[\text{M}+\text{H}]^+$  = 370.2171, found:  $[\text{M}+\text{H}]^+$  = 370.2161.

$(S_p, R)$ -**2a**:  $^1\text{H}$  NMR (400 MHz,  $\text{CDCl}_3$ )  $\delta$  15.93 (s, 1H), 7.59 – 7.52 (m, 2H), 7.47 (td,  $J$  = 7.7, 1.8 Hz, 2H), 7.35 (tt,  $J$  = 7.3, 1.5 Hz, 1H), 7.02 (dt,  $J$  = 7.8, 2.3 Hz, 1H), 6.59 (dt,  $J$  = 7.8, 1.9 Hz, 1H), 6.54 – 6.39 (m, 2H), 6.25 – 6.06 (m, 2H), 4.88 (d,  $J$  = 6.6 Hz, 1H), 3.45 (ddt,  $J$  = 12.8, 10.2, 2.4 Hz, 1H), 3.33 – 3.13 (m, 2H), 3.11 – 2.92 (m, 2H), 2.85 (ddd,  $J$  = 13.9, 9.6, 7.1 Hz, 1H), 2.56 (ddtd,  $J$  = 12.9, 10.7, 6.3, 5.2, 1.8 Hz, 1H), 2.40 (ddd,  $J$  = 12.5, 9.0, 6.9 Hz, 1H), 2.29 (s, 3H), 1.70 (dd,  $J$  = 6.6, 1.6 Hz, 3H);  $^{13}\text{C}$  NMR (126 MHz,  $\text{CDCl}_3$ )  $\delta$  170.10, 163.22, 144.55, 140.85, 139.92, 137.61, 136.24, 132.63, 131.44, 130.18, 129.44, 128.83, 127.30, 127.04, 126.46, 125.60, 122.22, 58.08, 37.21, 35.36, 33.88, 30.47, 24.96, 20.38; HRMS(ESI): calcd:  $[\text{M}+\text{H}]^+$  = 370.2171, found:  $[\text{M}+\text{H}]^+$  = 370.2163.

Then  $(R_p, R)$ -**2a** or  $(S_p, R)$ -**2a** was dissolved in tetrahydrofuran (15 mL), hydrochloric acid (1 mol/L, 24 mmol) was added dropwise at 0 °C, and the reaction was refluxed for 15 h. After cooling to temperature, the reaction solvent was removed by rotary evaporation. Then the reaction mixture was dissolved in  $\text{CH}_2\text{Cl}_2$  (15 mL) and washed three times with water ( $3 \times 10$  mL). The organic layer was separated, dried over  $\text{MgSO}_4$  and evaporated in vacuo. The residue was purified by column chromatography on silica gel (petroleum ether/ $\text{CH}_2\text{Cl}_2$  = 3:1) to give the product  $(R_p)$ -**1** (yield: 70 %) or  $(S_p)$ -**1** (yield: 68%) as a yellow powder.

Compound **1**:  $^1\text{H}$  NMR (400 MHz,  $\text{CDCl}_3$ )  $\delta$  12.88 (s, 1H), 6.97 (dd,  $J = 7.8, 1.5$  Hz, 1H), 6.62 (d,  $J = 7.9$  Hz, 1H), 6.54 (t,  $J = 7.5$  Hz, 1H), 6.47 (dd,  $J = 19.7, 7.0$  Hz, 2H), 6.31 (d,  $J = 7.5$  Hz, 1H), 3.64 (dd,  $J = 14.0, 9.5$  Hz, 1H), 3.42 (ddd,  $J = 13.1, 10.4, 2.8$  Hz, 1H), 3.27 – 2.89 (m, 5H), 2.79 – 2.64 (m, 1H), 2.57 (s, 3H).

The synthesis of ( $R_p, R$ )/( $S_p, R$ )-**3a**; ( $R_p$ )/( $S_p$ )-**3b**; ( $R_p, S$ )/( $S_p, S$ )-**3c** and ( $R_p$ )/( $S_p$ )-**3d**.

The synthesis method of ( $R_p$ )/( $S_p$ )-**2b** and ( $R_p$ )/( $S_p$ )-**2d** follows the same procedure of ( $R_p, R$ )/( $S_p, R$ )-**2a** with the compound ( $R_p$ )-**1** or ( $S_p$ )-**1** with benzylamine and ethanolamine.

( $R_p$ )-**2b**: Yield: 65%.  $^1\text{H}$  NMR (400 MHz,  $\text{CDCl}_3$ )  $\delta$  7.46 (d,  $J = 6.7$  Hz, 4H), 7.35 (t,  $J = 6.5$  Hz, 1H), 6.99 (d,  $J = 7.7$  Hz, 1H), 6.63 (d,  $J = 7.8$  Hz, 1H), 6.48 (dd,  $J = 23.0, 7.7$  Hz, 2H), 6.35 (d,  $J = 7.7$  Hz, 1H), 6.23 (d,  $J = 7.5$  Hz, 1H), 4.87 – 4.71 (m, 2H), 3.49 – 3.32 (m, 2H), 3.22 – 2.86 (m, 4H), 2.73 – 2.48 (m, 2H), 2.38 (s, 3H);  $^{13}\text{C}$  NMR (126 MHz,  $\text{CDCl}_3$ )  $\delta$  172.20, 162.42, 140.81, 140.08, 138.70, 137.65, 136.30, 132.65, 131.60, 129.98, 129.35, 128.85, 127.51, 127.26, 127.24, 125.72, 53.21, 37.16, 35.48, 33.90, 30.46, 20.87; HRMS(ESI): calcd:  $[\text{M}+\text{H}]^+ = 356.2014$ , found:  $[\text{M}+\text{H}]^+ = 356.2030$ .

( $S_p$ )-**2b**: Yield: 65%.  $^1\text{H}$  NMR (400 MHz,  $\text{CDCl}_3$ )  $\delta$  7.45 (d,  $J = 6.8$  Hz, 4H), 7.38 – 7.32 (m, 1H), 6.98 (dd,  $J = 7.7, 1.6$  Hz, 1H), 6.63 (dd,  $J = 7.9, 1.7$  Hz, 1H), 6.50 (dd,  $J = 7.8, 1.5$  Hz, 2H), 6.45 (d,  $J = 7.5$  Hz, 1H), 6.34 (dd,  $J = 7.8, 1.7$  Hz, 1H), 4.78 (d,  $J = 4.7$  Hz, 2H), 3.48 – 3.33 (m, 2H), 3.21 – 2.90 (m, 4H), 2.64 (ddd,  $J = 14.1, 10.0, 7.5$  Hz, 2H), 2.39 (s, 3H);  $^{13}\text{C}$  NMR (126 MHz,  $\text{CDCl}_3$ )  $\delta$  172.18, 162.42, 140.80, 140.07, 138.70, 137.65, 136.29, 132.65, 131.60, 129.97, 129.34, 128.85, 127.50, 127.26, 127.24, 125.71, 122.60, 53.21, 37.15, 35.48, 33.90, 30.46, 20.86; HRMS(ESI): calcd:  $[\text{M}+\text{H}]^+ = 356.2014$ , found:  $[\text{M}+\text{H}]^+ = 356.2015$ .

( $R_p$ )-**2d**: Yield: 89%.  $^1\text{H}$  NMR (400 MHz,  $\text{CDCl}_3$ )  $\delta$  6.95 (dd,  $J = 7.8, 1.9$  Hz, 1H), 6.60 (dd,  $J = 7.8, 2.0$  Hz, 1H), 6.47 (dd,  $J = 7.8, 1.9$  Hz, 1H), 6.41 (d,  $J = 7.5$  Hz, 1H), 6.33 (dd,  $J = 7.8, 2.0$  Hz, 1H), 6.19 (d,  $J = 7.5$  Hz, 1H), 4.05 (t,  $J = 5.4$  Hz, 2H), 3.67 (q,  $J = 5.6$  Hz, 2H), 3.36 (dddd,  $J = 14.6, 11.9, 9.9, 2.7$  Hz, 2H), 3.20 – 2.85 (m, 4H), 2.64 (ddd,  $J = 13.1, 9.4, 7.0$  Hz, 1H), 2.51 (ddd,  $J = 12.9, 10.6, 5.2$  Hz, 1H), 2.30 (s, 3H);  $^{13}\text{C}$  NMR (126 MHz,  $\text{CDCl}_3$ )  $\delta$  172.05, 161.43, 139.79, 138.99, 136.66, 135.33, 131.62, 130.61, 128.81, 128.30, 126.14, 124.69, 121.38, 61.44, 50.27, 36.08, 34.39, 32.86, 29.40, 19.84; HRMS (ESI): calcd:  $[\text{M}+\text{H}]^+ = 310.1807$ , found:  $[\text{M}+\text{H}]^+ = 310.1799$ .

( $S_p$ )-**2d**: Yield: 89%.  $^1\text{H}$  NMR (400 MHz,  $\text{CDCl}_3$ )  $\delta$  7.13 – 7.02 (m, 1H), 6.69 – 6.52 (m, 3H), 6.39 – 6.17 (m, 2H), 4.34 – 4.16 (m, 1H), 4.09 – 3.87 (m, 3H), 3.56 (dddd,  $J = 23.9, 13.6, 10.4, 3.8$  Hz, 1H), 3.36 – 3.11 (m, 3H), 3.11 – 2.89 (m, 3H), 2.63 (s, 3H), 2.43 (s, 1H);  $^{13}\text{C}$  NMR (126 MHz,  $\text{CDCl}_3$ )  $\delta$  172.05, 161.42, 139.79, 138.99, 136.66, 135.33, 131.62, 130.61, 128.81, 128.29, 126.14, 124.69, 121.38, 61.44, 50.28, 36.08, 34.39, 32.86, 29.40, 19.84; HRMS(ESI): calcd:  $[\text{M}+\text{H}]^+ = 310.1807$ , found:  $[\text{M}+\text{H}]^+ = 310.1797$ .

The synthesis method of ( $R_p, S$ )/( $S_p, S$ )-**2c**.<sup>4-5</sup>

Compound **1** was dissolved in dry toluene (10 mL), and ( $S$ )-*tert*-Leucinol (4 mmol) was added at room temperature and refluxed for 36 h. After cooling to temperature, the reaction solvent was removed by rotary evaporation. The residue was purified by column chromatography on silica gel ( $\text{CH}_2\text{Cl}_2$  to  $\text{CH}_2\text{Cl}_2$ / ethyl acetate = 5:1) to give the products ( $R_p, S$ )-**2c** (yield: 42 %) and ( $S_p, S$ )-**2c** (yield: 45 %) as brownish yellow solid.

( $R_p, S$ )-**2c**: Yield: 42%.  $^1\text{H}$  NMR (500 MHz,  $\text{CDCl}_3$ )  $\delta$  6.95 (dd,  $J = 7.8, 1.9$  Hz, 1H), 6.64 (dd,  $J = 7.9, 2.0$  Hz, 1H), 6.51 (dd,  $J = 7.9, 1.9$  Hz, 1H), 6.42 – 6.34 (m, 2H), 6.17 (dt,  $J = 5.5, 2.7$  Hz, 1H), 3.97 – 3.92 (m, 1H), 3.82 – 3.75 (m, 1H), 3.66 (dd,  $J = 7.3, 5.1$  Hz, 1H), 3.35 (dddd,  $J = 26.2, 12.6, 9.5, 4.9$  Hz, 2H), 3.15 (ddd,  $J = 12.9, 10.2, 5.3$  Hz, 1H), 3.10 – 2.87 (m, 4H), 2.77 – 2.65 (m, 1H), 2.56 – 2.44 (m, 1H), 2.35 (d,  $J = 2.0$  Hz, 3H), 1.15 (s, 9H);  $^{13}\text{C}$  NMR (126 MHz,  $\text{CDCl}_3$ )  $\delta$  172.49, 164.58, 141.10, 140.19, 137.75, 136.73, 132.63, 131.76, 130.53, 129.58, 127.11, 125.34, 122.18, 68.68, 63.42, 37.29, 35.58, 34.09, 33.93, 30.49, 27.14, 20.63; HRMS(ESI): calcd:  $[\text{M}+\text{H}]^+ = 366.2433$ , found:  $[\text{M}+\text{H}]^+ = 366.2423$ .

(*S<sub>p</sub>*, *S*)-**2c**: Yield: 45%. <sup>1</sup>H NMR (500 MHz, CDCl<sub>3</sub>) δ 6.97 (dd, *J* = 7.8, 1.9 Hz, 1H), 6.61 (dd, *J* = 7.9, 1.9 Hz, 1H), 6.47 (dd, *J* = 7.9, 1.9 Hz, 1H), 6.44 – 6.40 (m, 2H), 6.21 (d, *J* = 7.5 Hz, 1H), 4.14 (dd, *J* = 10.2, 2.9 Hz, 1H), 3.89 – 3.84 (m, 1H), 3.65 (dd, *J* = 9.2, 2.9 Hz, 1H), 3.45 – 3.38 (m, 2H), 3.19 – 2.83 (m, 5H), 2.67 (ddd, *J* = 13.2, 9.3, 7.6 Hz, 1H), 2.51 (ddd, *J* = 13.0, 10.7, 5.0 Hz, 1H), 2.34 (s, 3H), 1.03 (s, 9H); <sup>13</sup>C NMR (126 MHz, CDCl<sub>3</sub>) δ 172.16, 162.37, 141.01, 139.93, 137.92, 135.93, 132.75, 131.43, 129.99, 129.28, 127.02, 125.73, 122.54, 69.19, 63.95, 37.60, 35.24, 33.92, 33.85, 30.27, 27.08, 20.89; HRMS(ESI): calcd: [M+H]<sup>+</sup> = 366.2433, found: [M+H]<sup>+</sup> = 366.2428.

The synthesis of (*R<sub>p</sub>*, *R*)/(*S<sub>p</sub>*, *R*)-**3a**; (*R<sub>p</sub>*)/(*S<sub>p</sub>*)-**3b**; (*R<sub>p</sub>*, *S*)/(*S<sub>p</sub>*, *S*)-**3c** and (*R<sub>p</sub>*)/(*S<sub>p</sub>*)-**3d**.

Compound (*R<sub>p</sub>*, *R*)-**2a** or (*S<sub>p</sub>*, *R*)-**2a** or (*R<sub>p</sub>*)-**2b** or (*S<sub>p</sub>*)-**2b** or (*R<sub>p</sub>*, *S*)-**2c** or (*S<sub>p</sub>*, *S*)-**2c** or (*R<sub>p</sub>*)-**2d** or (*S<sub>p</sub>*)-**2d** (1.0 mmol) in was dissolved in dry toluene (15 mL), and Et<sub>3</sub>N (0.3 mL) was added. After the mixture was stirred for 15 min, BF<sub>3</sub> · Et<sub>2</sub>O (1.28 mL) was added dropwise, and further stirred at room temperature for 3 h. The reaction solvent was removed by rotary evaporation. The residue was dissolved in CH<sub>2</sub>Cl<sub>2</sub> (15 mL) and washed three times with water (3 × 10 mL). The organic layer was separated, dried over MgSO<sub>4</sub> and evaporated in vacuo. The residue was purified by column chromatography on silica gel (petroleum ether/CH<sub>2</sub>Cl<sub>2</sub> = 3:1 to CH<sub>2</sub>Cl<sub>2</sub>/ ethyl acetate = 5:1) to give the corresponding product as yellow solid compound.

(*R<sub>p</sub>*, *R*)-**3a**: Yield: 43%. <sup>1</sup>H NMR (500 MHz, CDCl<sub>3</sub>) δ 7.33 (ddd, *J* = 25.4, 16.3, 7.8 Hz, 5H), 7.14 (dd, *J* = 14.7, 7.7 Hz, 1H), 6.65 (d, *J* = 7.8 Hz, 1H), 6.62 – 6.55 (m, 2H), 6.42 – 6.38 (m, 1H), 6.24 (dd, *J* = 14.3, 7.4 Hz, 1H), 3.58 (ddt, *J* = 15.1, 9.1, 4.4 Hz, 1H), 3.36 – 3.27 (m, 1H), 3.19 (ddt, *J* = 21.3, 14.0, 8.4 Hz, 2H), 2.99 (dtd, *J* = 27.7, 13.0, 11.2, 5.4 Hz, 3H), 2.76 (ddd, *J* = 12.7, 9.0, 6.9 Hz, 1H), 2.67 – 2.56 (m, 1H), 2.36 (s, 1H), 2.25 (s, 2H), 2.01 – 1.94 (m, 3H); <sup>13</sup>C NMR (101 MHz, CDCl<sub>3</sub>) δ 171.82, 158.87, 158.83, 142.28, 140.91, 140.43, 139.79, 137.38, 132.80, 132.03, 131.76, 130.30, 129.78, 129.73, 129.28, 128.79, 127.59, 126.54, 126.53, 56.48, 38.12, 36.03, 34.28, 29.12, 22.71, 18.87; HRMS (ESI): calcd: [M+Na]<sup>+</sup> = 440.1973, found: [M+Na]<sup>+</sup> = 440.1981.

(*S<sub>p</sub>*, *R*)-**3a**: Yield: 39%. <sup>1</sup>H NMR (500 MHz, CDCl<sub>3</sub>) δ 7.47 – 7.30 (m, 5H), 7.14 (dd, *J* = 15.3, 7.8 Hz, 1H), 6.69 – 6.53 (m, 3H), 6.32 (d, *J* = 7.7 Hz, 1H), 6.24 (dd, *J* = 14.2, 7.4 Hz, 1H), 3.64 – 3.49 (m, 1H), 3.40 – 2.88 (m, 6H), 2.76 (dt, *J* = 14.1, 7.9 Hz, 1H), 2.69 – 2.55 (m, 1H), 2.36 (s, 3H), 1.99 (d, *J* = 7.2 Hz, 3H); <sup>13</sup>C NMR (101 MHz, CDCl<sub>3</sub>) δ 171.57, 158.84, 158.78, 142.28, 141.17, 140.84, 140.48, 137.49, 133.26, 131.95, 131.73, 130.02, 129.97, 129.26, 128.88, 127.48, 126.33, 46.30, 37.65, 37.64, 36.05, 34.44, 29.01, 23.34; HRMS (ESI): calcd: [M+Na]<sup>+</sup> = 440.1973, found: [M+Na]<sup>+</sup> = 440.1982.

(*R<sub>p</sub>*)-**3b**: Yield: 40%. <sup>1</sup>H NMR (500 MHz, CDCl<sub>3</sub>) δ 7.38 (d, *J* = 4.4 Hz, 4H), 7.31 (dq, *J* = 8.7, 4.1 Hz, 1H), 7.15 (dd, *J* = 7.8, 1.5 Hz, 1H), 6.68 – 6.55 (m, 3H), 6.34 (dd, *J* = 7.8, 1.7 Hz, 1H), 6.26 (d, *J* = 7.4 Hz, 1H), 5.11 (d, *J* = 15.3 Hz, 1H), 4.87 (d, *J* = 15.5 Hz, 1H), 3.59 (ddd, *J* = 13.6, 10.4, 3.8 Hz, 1H), 3.30 (ddd, *J* = 14.6, 10.5, 4.3 Hz, 1H), 3.22 (ddd, *J* = 12.6, 9.3, 3.2 Hz, 1H), 3.10 – 2.94 (m, 3H), 2.72 (ddd, *J* = 13.2, 9.3, 5.7 Hz, 1H), 2.62 (ddd, *J* = 14.7, 10.7, 4.3 Hz, 1H), 2.38 (s, 3H); <sup>13</sup>C NMR (126 MHz, CDCl<sub>3</sub>) δ 172.58, 159.02, 142.56, 141.55, 140.56, 137.45, 135.98, 133.01, 132.07, 131.81, 130.27, 129.88, 129.84, 129.16, 129.06, 127.78, 127.21, 51.18, 37.48, 36.02, 34.35, 29.26, 22.15; HRMS (ESI): calcd: [M+ Na]<sup>+</sup> = 426.1817, found: [M+ Na]<sup>+</sup> = 426.1813

(*S<sub>p</sub>*)-**3b**: Yield: 41%. <sup>1</sup>H NMR (500 MHz, CDCl<sub>3</sub>) δ 7.38 (d, *J* = 4.3 Hz, 5H), 7.14 (d, *J* = 7.5 Hz, 1H), 6.67 – 6.56 (m, 3H), 6.34-6.26 (m, 2H), 5.11 (d, *J* = 15.4 Hz, 1H), 4.87 (d, *J* = 15.6 Hz, 1H), 3.59 (ddd, *J* = 13.6, 10.6, 3.7 Hz, 1H), 3.30 (td, *J* = 11.9, 10.6, 4.1 Hz, 1H), 3.20 (td, *J* = 8.2, 7.6, 4.5 Hz, 1H), 3.12 – 2.93 (m, 3H), 2.72 (ddd, *J* = 13.5, 9.3, 5.7 Hz, 1H), 2.62 (td, *J* = 12.3, 10.9, 4.1 Hz, 1H), 2.38 (s, 3H); <sup>13</sup>C NMR (126 MHz, CDCl<sub>3</sub>) δ 171.53, 158.19, 141.51, 140.50, 139.51, 136.40, 131.96, 131.02, 130.76, 129.21, 128.83, 128.78, 128.11, 128.01, 126.74, 126.16, 50.14, 46.03, 36.44, 34.98, 33.30, 28.21; HRMS(ESI): calcd: [M+ Na]<sup>+</sup> = 426.1817, found: [M+Na]<sup>+</sup> = 426.1810

(*R<sub>p</sub>*, *S*)-**3c**: Yield: 42%. <sup>1</sup>H NMR (400 MHz, CDCl<sub>3</sub>) δ 6.76 (dd, *J* = 7.8, 1.6 Hz, 1H), 6.70 (d, *J* = 7.9 Hz, 1H), 6.65 – 6.57 (m, 2H), 6.22 – 6.13 (m, 2H), 4.27 (d, *J* = 8.9 Hz, 1H), 4.13 – 3.97 (m, 2H), 3.71 – 3.57 (m, 2H), 3.28 – 2.96 (m, 6H), 2.83 (s, 3H), 1.14 (s, 9H); <sup>13</sup>C NMR (101 MHz, CDCl<sub>3</sub>) δ 170.06, 159.27, 141.69, 141.04, 140.48, 137.10, 132.71, 131.71, 130.55, 128.86, 128.20, 120.18, 119.13, 70.01, 65.52, 37.31, 36.63, 35.09, 33.73, 29.33, 27.75, 22.14; HRMS(ESI): calcd: [M+ Na]<sup>+</sup> = 416.2173, found: [M+ Na]<sup>+</sup> = 416.2167

(*S<sub>p</sub>*, *S*)-**3c**: Yield: 42%. <sup>1</sup>H NMR (400 MHz, CDCl<sub>3</sub>) δ 7.19 – 7.10 (m, 1H), 6.67 (qd, *J* = 7.8, 1.5 Hz, 2H), 6.57 (d, *J* = 7.4 Hz, 1H), 6.40 (d, *J* = 7.7 Hz, 1H), 6.21 (d, *J* = 7.4 Hz, 1H), 4.15 (d, *J* = 9.1 Hz, 1H), 3.78 (ddd, *J* = 9.4, 6.0, 3.4 Hz, 1H), 3.72 – 3.52 (m, 2H), 3.38 – 3.11 (m, 3H), 3.05 (q, *J* = 7.1 Hz, 2H), 2.92 (ddd, *J* = 12.9, 10.5, 4.5 Hz, 1H), 2.66 (ddd, *J* = 13.7, 10.6, 3.6 Hz, 1H), 2.53 (s, 3H), 1.24 (s, 9H); <sup>13</sup>C NMR (101 MHz, CDCl<sub>3</sub>) δ 164.13, 154.17, 137.17, 136.48, 135.88, 132.62, 129.04, 127.33, 126.52, 126.43, 126.33, 125.15, 124.11, 72.58, 72.26, 71.94, 65.10, 59.65, 31.74, 31.42, 31.34, 30.05, 24.47, 22.98, 22.96, 19.31; HRMS(ESI): calcd: [M+ Na]<sup>+</sup> = 416.2173, found: [M+ Na]<sup>+</sup> = 416.2185.

(*R<sub>p</sub>*)-**3d**: Yield: 38%. <sup>1</sup>H NMR (500 MHz, CDCl<sub>3</sub>) δ 7.05 (dd, *J* = 7.8, 1.9 Hz, 1H), 6.66 (dd, *J* = 7.9, 2.0 Hz, 1H), 6.60 (d, *J* = 7.8 Hz, 2H), 6.31 (dd, *J* = 7.9, 2.0 Hz, 1H), 6.27 (d, *J* = 7.4 Hz, 1H), 4.20 (ddd, *J* = 11.6, 7.6, 4.3 Hz, 1H), 4.06 – 3.91 (m, 3H), 3.62 – 3.48 (m, 1H), 3.27 (dddd, *J* = 18.5, 16.0, 9.6, 4.9 Hz, 2H), 3.16 (ddd, *J* = 14.3, 9.3, 5.9 Hz, 1H), 3.07 – 2.86 (m, 3H), 2.63 (s, 3H), 2.61 (d, *J* = 6.1 Hz, 1H); <sup>13</sup>C NMR (101 MHz, CDCl<sub>3</sub>) δ 172.55, 165.58, 141.16, 140.18, 137.72, 136.87, 132.60, 131.71, 130.54, 129.82, 127.09, 125.24, 121.90, 68.49, 63.17, 37.35, 35.58, 35.46, 34.04, 33.92, 30.50, 27.13; HRMS(ESI): calcd: [M+ Na]<sup>+</sup> = 360.1547, found: [M+ Na]<sup>+</sup> = 360.1538

(*S<sub>p</sub>*)-**3d**: Yield: 39%. <sup>1</sup>H NMR (500 MHz, CDCl<sub>3</sub>) δ 7.05 (d, *J* = 7.6 Hz, 1H), 6.63 (dd, *J* = 30.3, 7.6 Hz, 3H), 6.29 (dd, *J* = 20.8, 7.5 Hz, 2H), 4.19 (s, 1H), 4.06 – 3.92 (m, 3H), 3.53 (t, *J* = 11.7 Hz, 1H), 3.34 – 2.88 (m, 7H), 2.63 (s, 3H); <sup>13</sup>C NMR (101 MHz, CDCl<sub>3</sub>) δ 164.15, 154.19, 137.19, 136.49, 135.89, 132.63, 129.05, 129.04, 127.34, 126.53, 126.44, 126.35, 125.17, 124.13, 65.11, 59.66, 31.74, 31.43, 31.35, 30.06, 24.47, 22.98, 22.96; HRMS(ESI): calcd: [M+ Na]<sup>+</sup> = 360.1547, found: [M+ Na]<sup>+</sup> = 360.1575.

## References

- [1] (a) D. Y. Antonov, Y. N. Belokon, N. S. Ikonnikov, S. A. Orlova, A. P. Pisarevsky, N. I. Raevski, V. I. Rozenberg, E. V. Sergeeva, Y. T. Struchkov, V. I. Tararov, E. V. Vorontsov, *J. Chem. Soc. Perkin. Trans.* 1995, **1**, 1873-1879.
- [2] M. Cakici, Z. G. Gu, M. Nieger, J. Bürck, L. Heinke, S. Bräse, *Chem. Commun.* 2015, **51**, 4796-4798.
- [3] C. J. Friedmann, S. Ay, S. Bräse, *J. Org. Chem.* 2010, **75**, 4612-4614.
- [4] D. Y. Xin, Y. D. Ma, F. Y. He, *Tetrahedron: Asymmetry*, 2010, **21**, 333-338.
- [5] F. Y. He, Y. D. Ma, L. Zhao, W. Z. Duan, J. Q. Chen, Z. X. Zhao, *Tetrahedron: Asymmetry*, 2012, **23**, 809-817.

## 2. Spectroscopic Properties

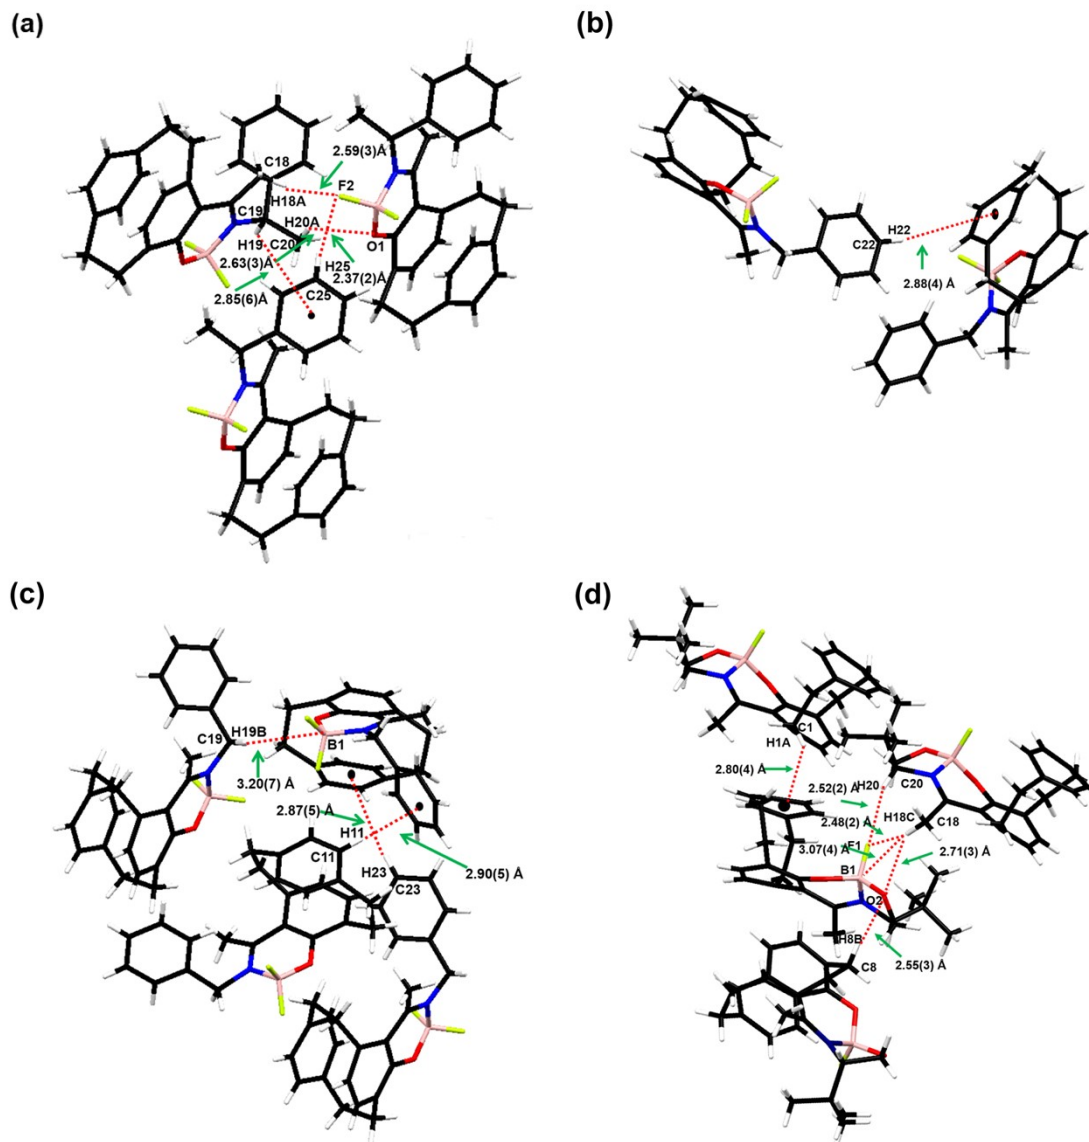

Figure S1. Crystal packing structures of  $(S_p, R)$ -**3a** (a),  $(R_p)$ -**3b** (b),  $(S_p)$ -**3b** (c) and  $(R_p, S)$ -**3c** (d).

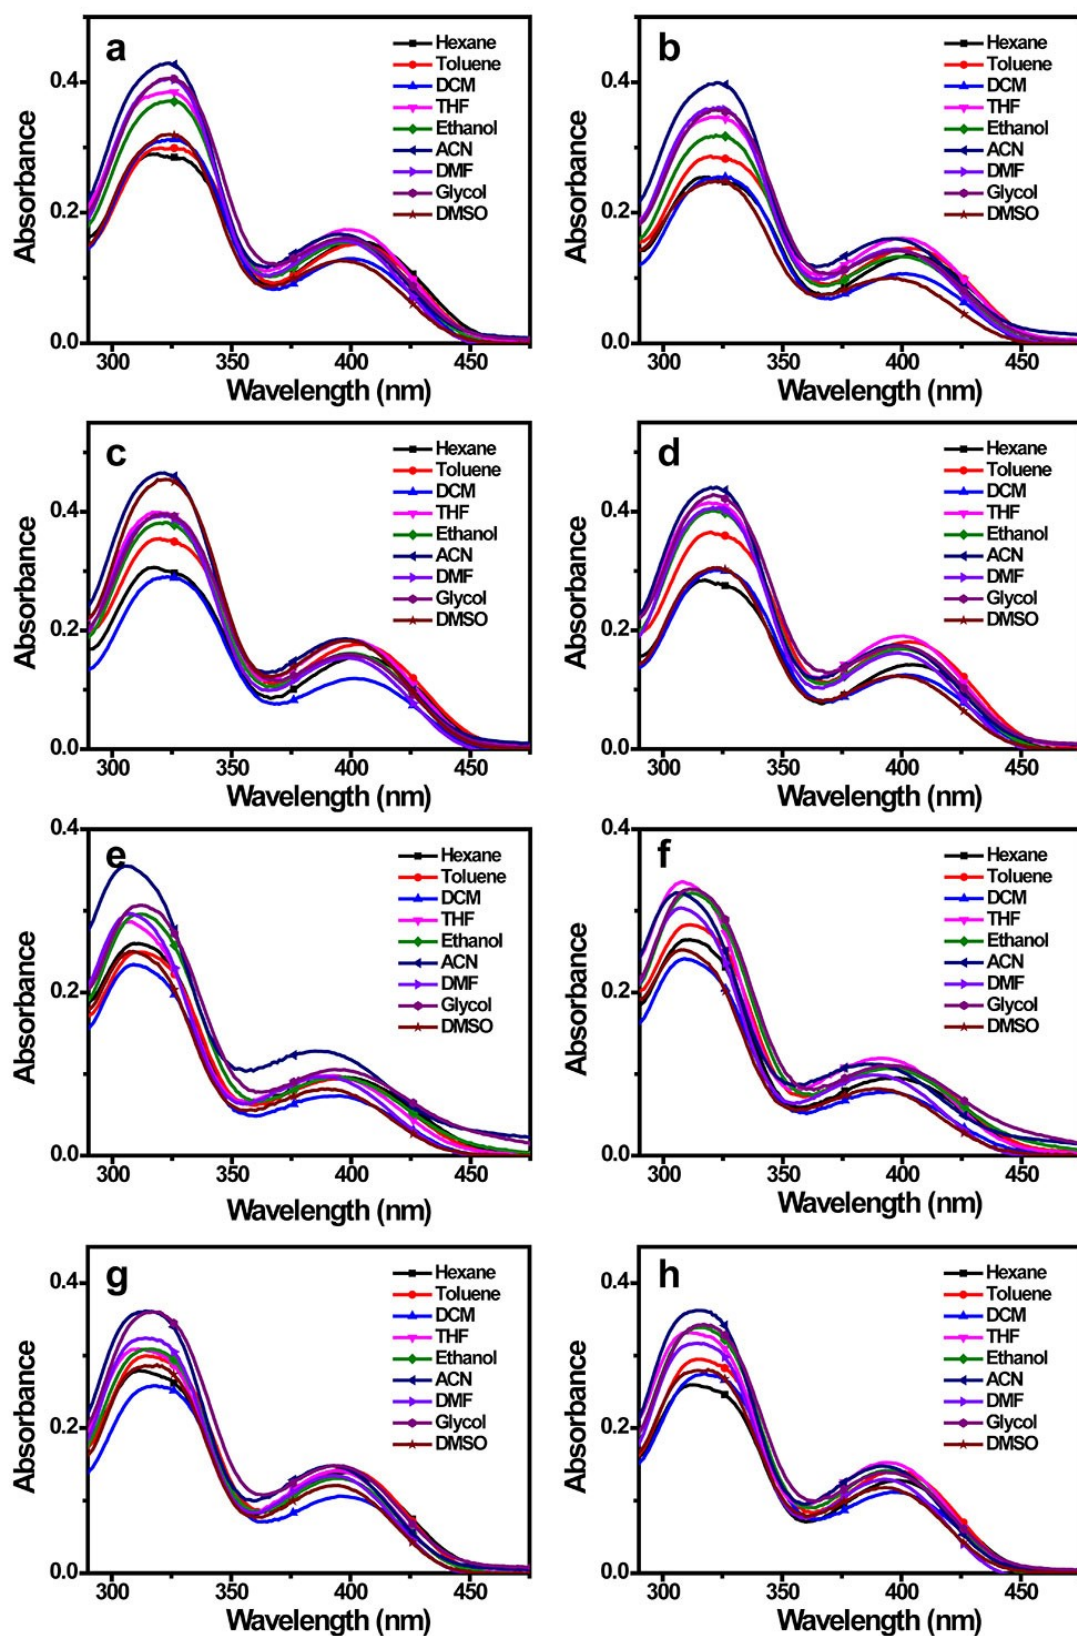

Figure S2. Absorption spectra of compounds ( $R_p, R$ )-**3a** (a), ( $S_p, R$ )-**3a** (b), ( $R_p$ )-**3b** (c), ( $S_p$ )-**3b** (d), ( $R_p, S$ )-**3c** (e), ( $S_p, S$ )-**3c** (f), ( $R_p$ )-**3d** (g) and ( $S_p$ )-**3d** (h) in various solvents (50  $\mu$ M) such as hexane, toluene, dichloromethane (DCM), tetrahydrofuran (THF), ethanol, acetonitrile (ACN), dimethylformamide (DMF), ethylene glycol (Glycol) and dimethyl sulfoxide (DMSO), respectively.

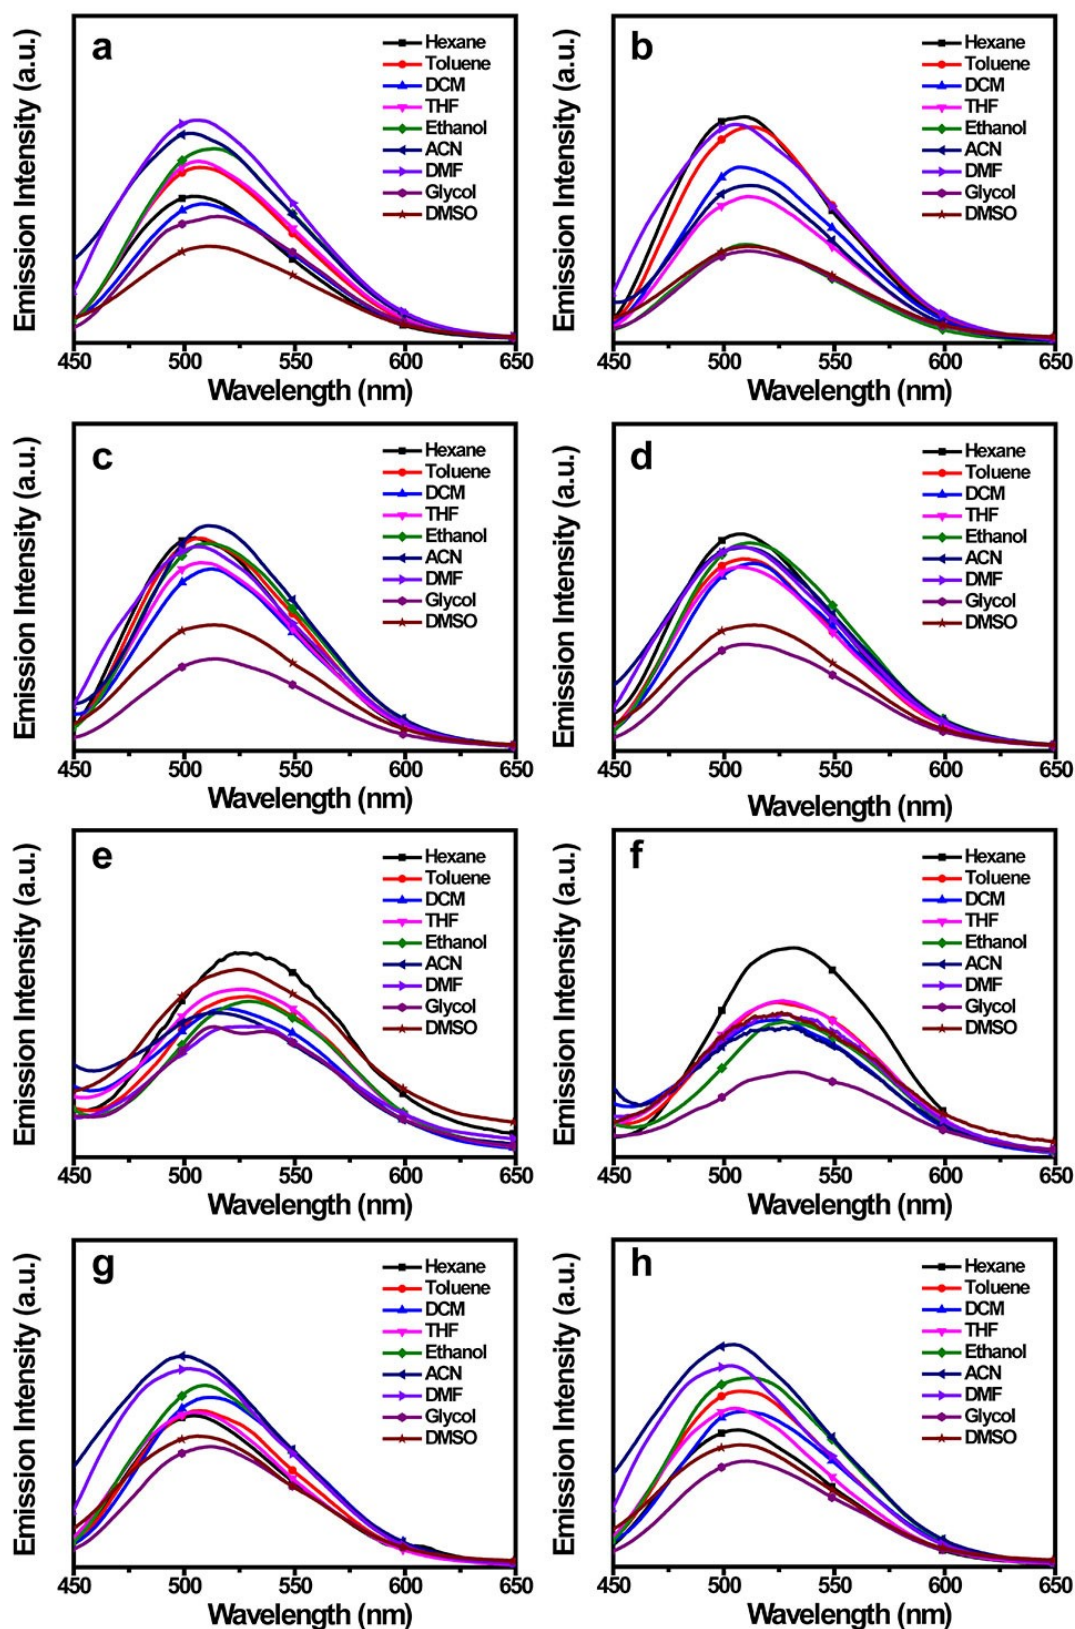

**Figure S3.** Emission spectra of compounds  $(R_p, R)$ -**3a** (a),  $(S_p, R)$ -**3a** (b),  $(R_p)$ -**3b** (c),  $(S_p)$ -**3b** (d),  $(R_p, S)$ -**3c** (e),  $(S_p, S)$ -**3c** (f),  $(R_p)$ -**3d** (g) and  $(S_p)$ -**3d** (h) in various solvents (50  $\mu$ M) such as hexane, toluene, dichloromethane (DCM), tetrahydrofuran (THF), ethanol, acetonitrile (ACN), dimethylformamide (DMF), ethylene glycol (Glycol) and dimethyl sulfoxide (DMSO) respectively.



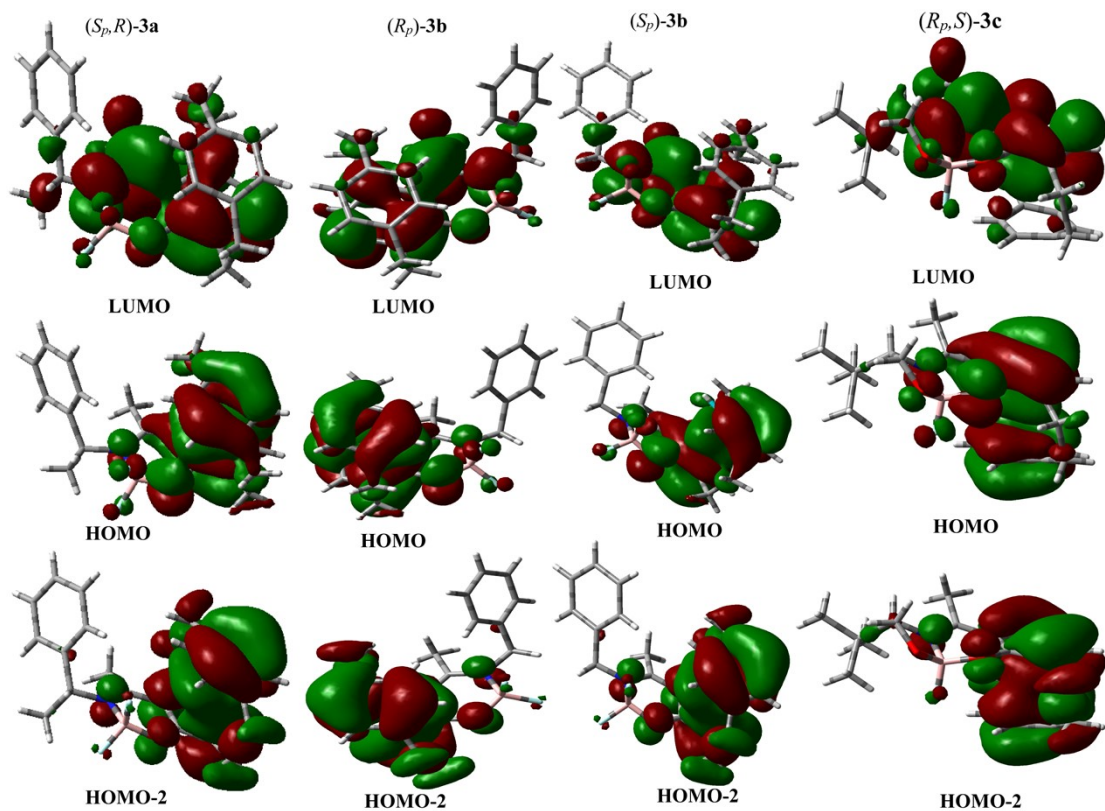

**Figure S4.** The angular nodal patterns of the LUMO, HOMO and HOMO-2 of ( $S_p, R$ )-**3a** (a), ( $R_p$ )-**3b** (b), ( $S_p$ )-**3b** (c) and ( $R_p, S$ )-**3c** (d), calculated by using B3LYP/6-31G(d) basis set with the G09 program package.

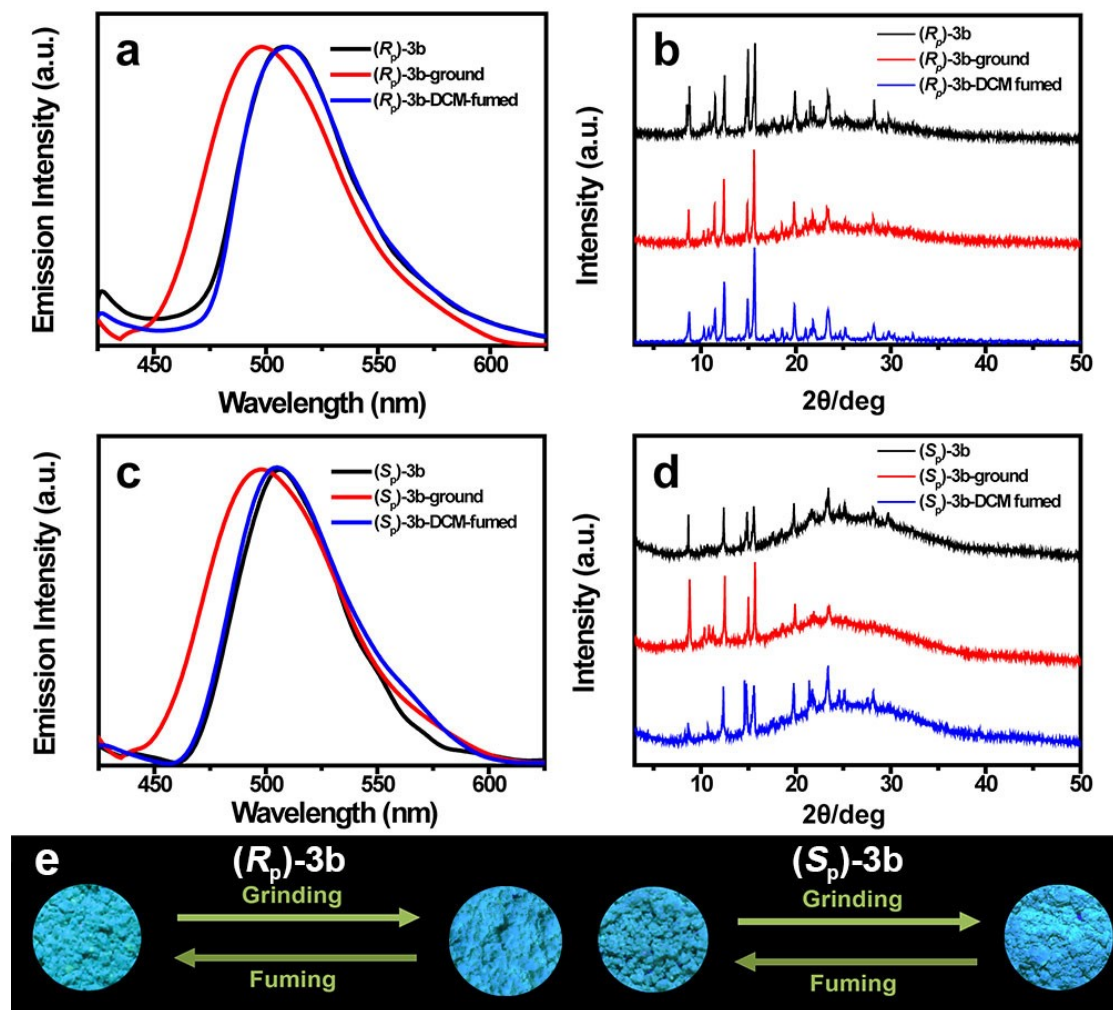

**Figure S5.** (1) Normalized fluorescence spectra of  $(R_p)$ -**3b** (a),  $(S_p)$ -**3b** (c) in solid-state, after being ground and DCM (dichloromethane) fumed; (2) Powder XRD patterns of  $(R_p)$ -**3b** (b),  $(S_p)$ -**3b** (d) in solid-state; (3) Photographs of  $(R_p)$ / $(S_p)$ -**3b** upon grinding and fuming with DCM at 365 nm UV irradiation.

**Table S1.** Calculated excited wavelength ( $\lambda$ ) and oscillator strengths ( $f$ ) and related wave functions

| Compound              | State          | Energy [eV] | $\lambda$ [nm] | $f^{[b]}$ | Orbitals (coefficient) <sup>[c]</sup> |
|-----------------------|----------------|-------------|----------------|-----------|---------------------------------------|
| $(S_p,R)$ - <b>3a</b> | S <sub>1</sub> | 3.1110      | 398.54         | 0.0444    | H>L (69.2%)                           |
|                       | S <sub>3</sub> | 3.7142      | 333.81         | 0.0616    | H-2>L(68.9%)                          |
| $(R_p)$ - <b>3b</b>   | S <sub>1</sub> | 3.0884      | 401.46         | 0.0414    | H>L (69.2%)                           |
|                       | S <sub>3</sub> | 3.7414      | 331.39         | 0.0569    | H-2>L (68.8%)                         |
| $(S_p)$ - <b>3b</b>   | S <sub>1</sub> | 3.0896      | 401.29         | 0.0399    | H>L (69.3%)                           |
|                       | S <sub>3</sub> | 3.7316      | 332.26         | 0.0603    | H-2>L (68.7%)                         |
| $(R_p,S)$ - <b>3c</b> | S <sub>1</sub> | 3.0748      | 403.22         | 0.0460    | H>L (69.9%)                           |
|                       | S <sub>3</sub> | 3.8436      | 322.57         | 0.0932    | H-2>L (68.7%)                         |

<sup>[a]</sup>Excited state; <sup>[b]</sup>Oscillator strength; <sup>[c]</sup>MOs involved in the transitions, H = HOMO, L = LUMO.



### 3. NMR spectra

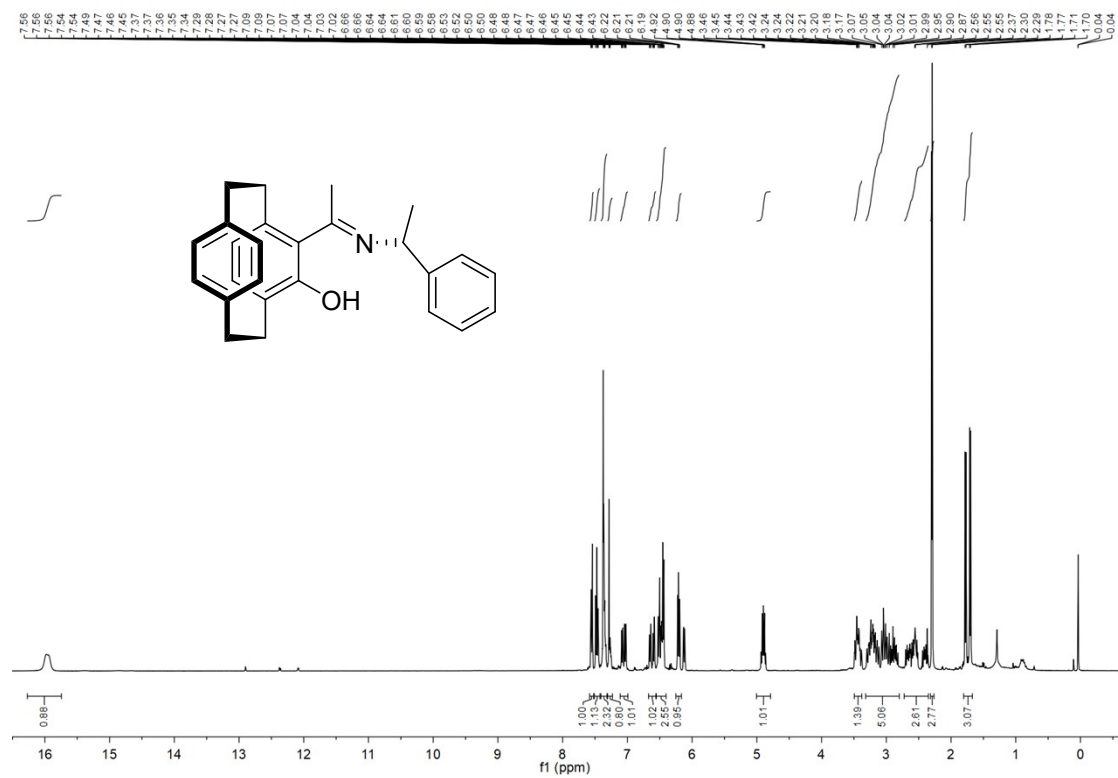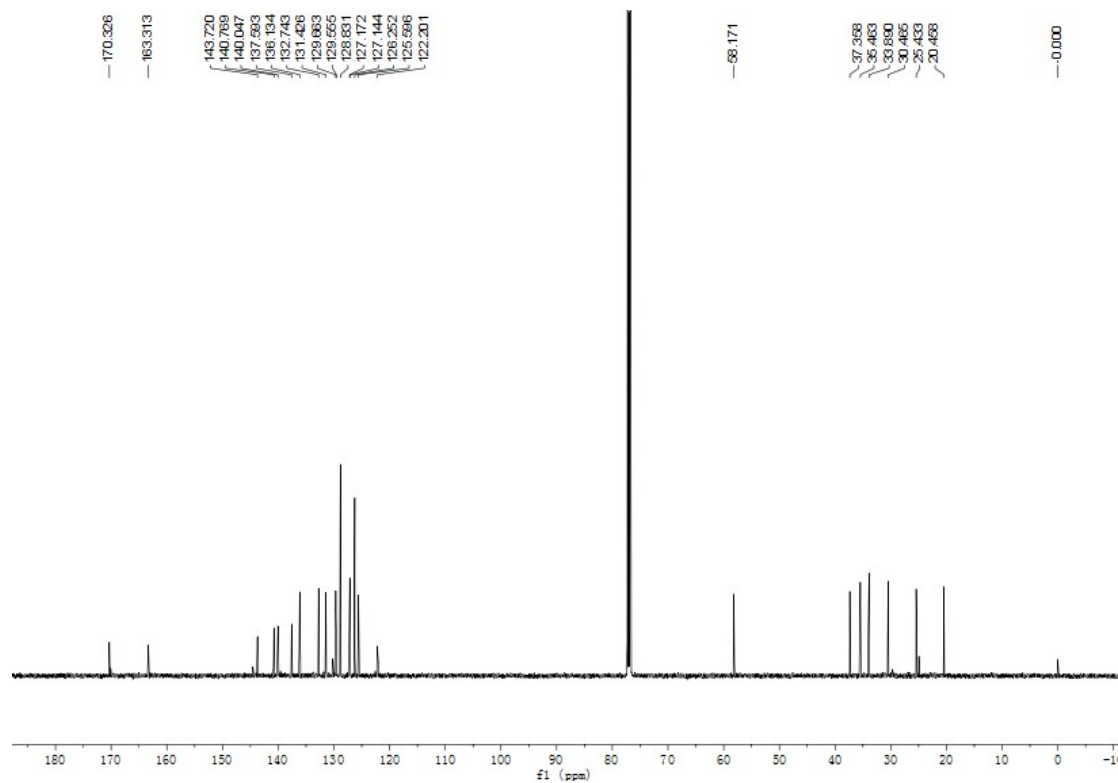

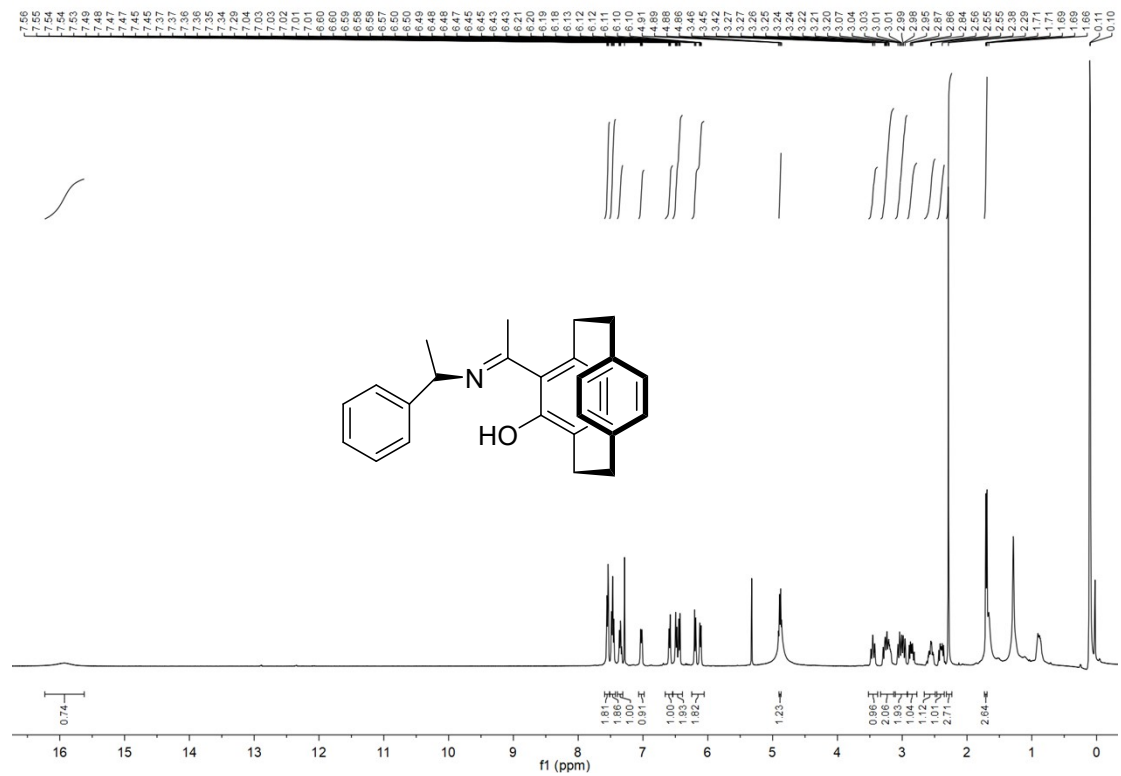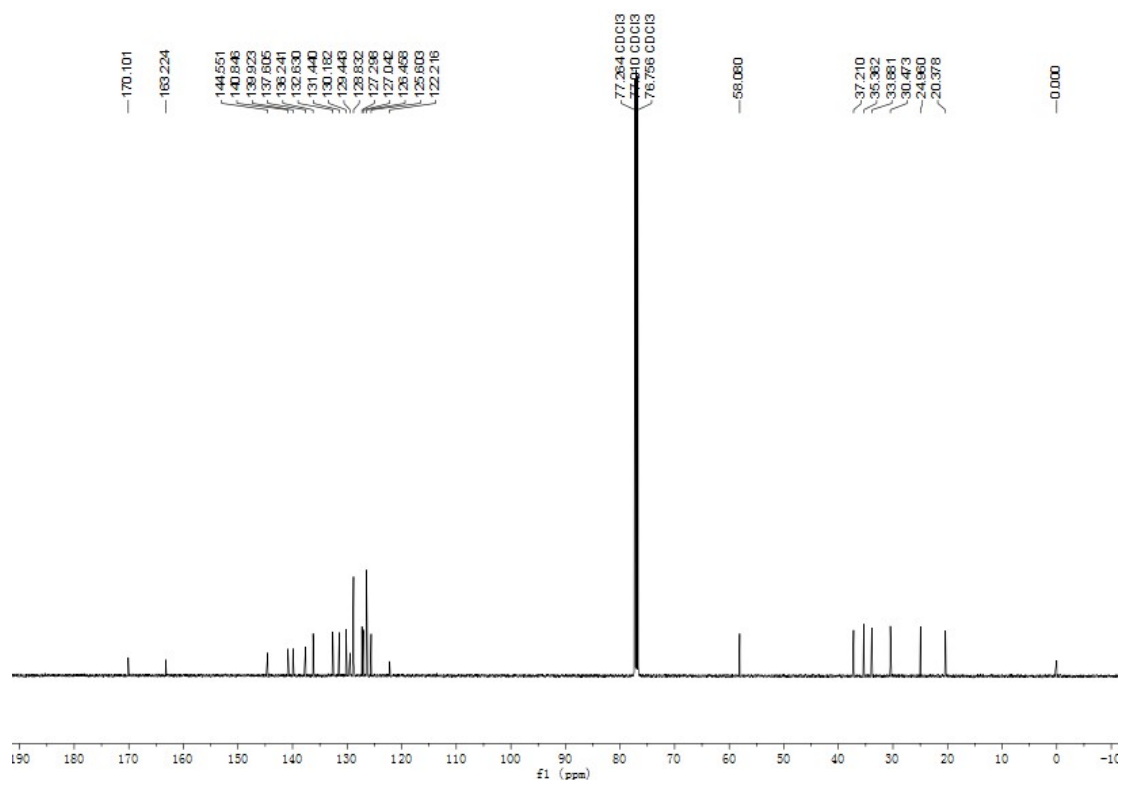

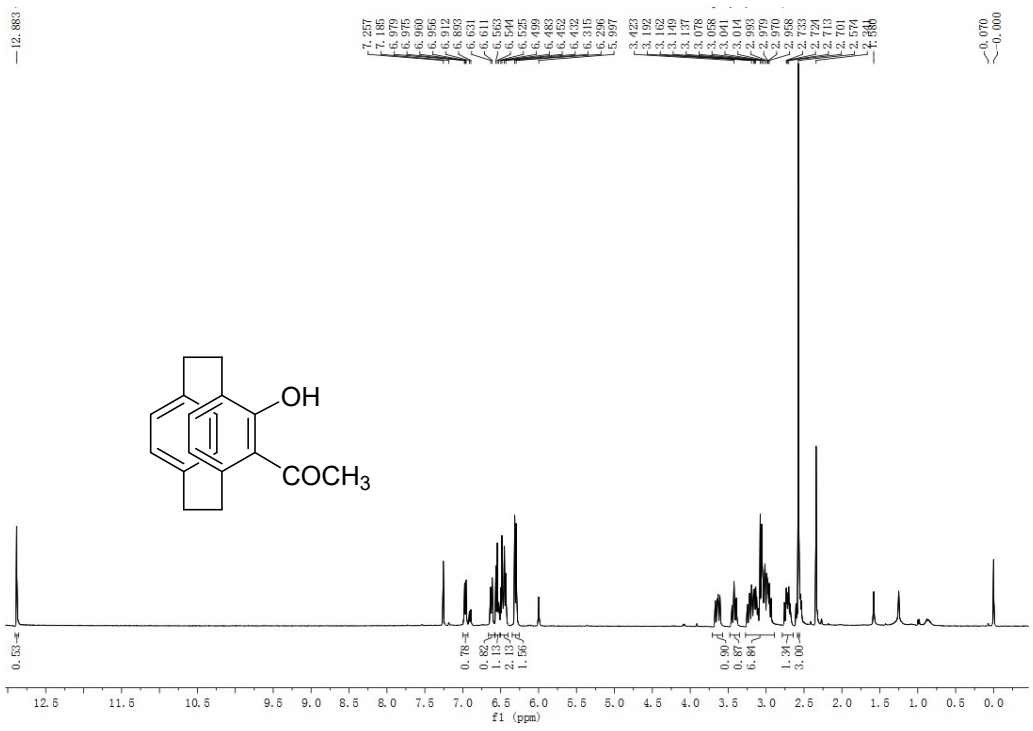

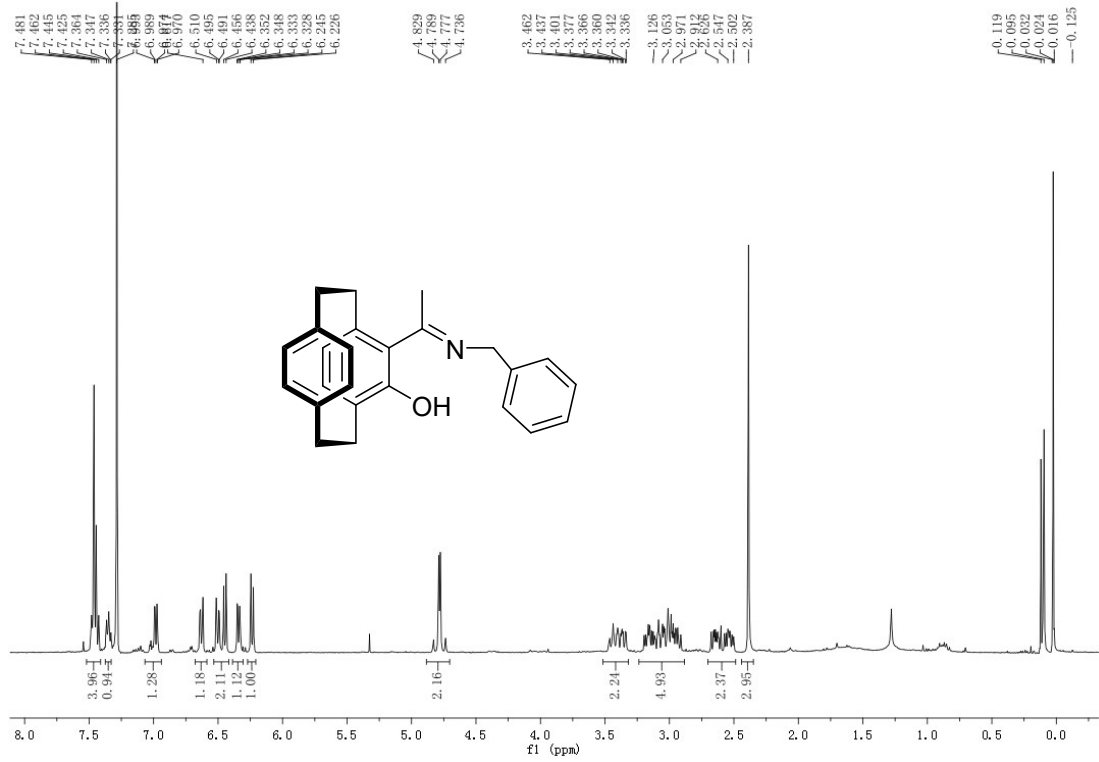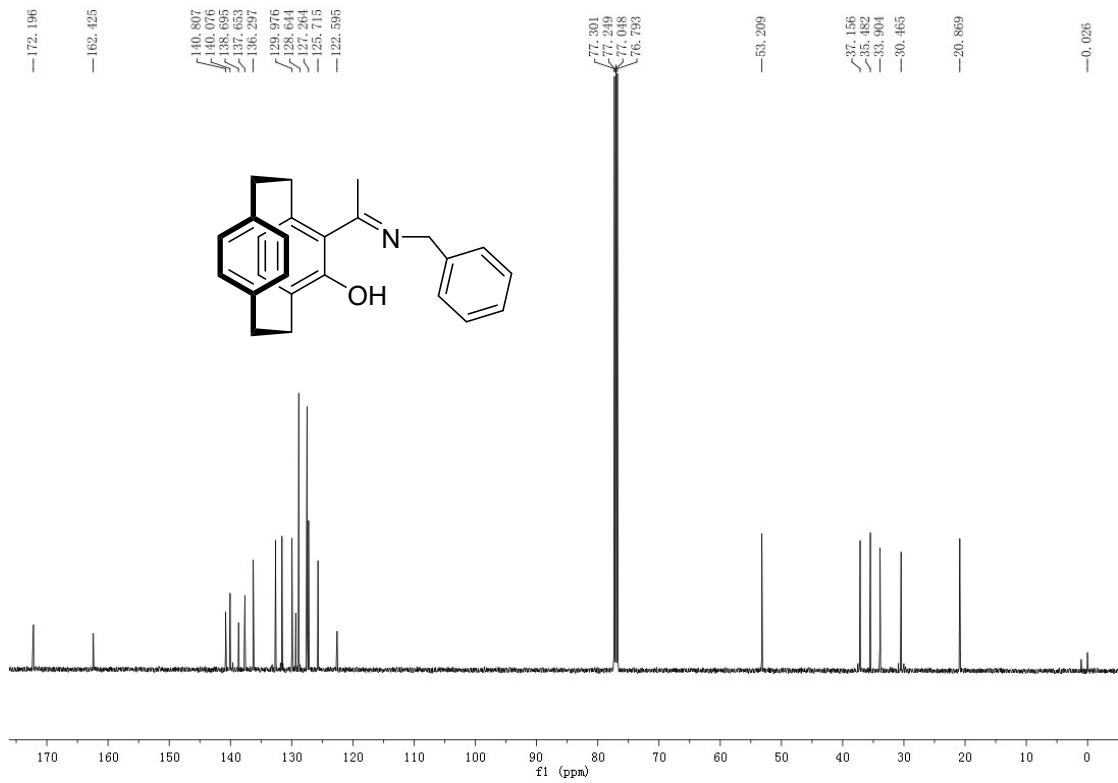

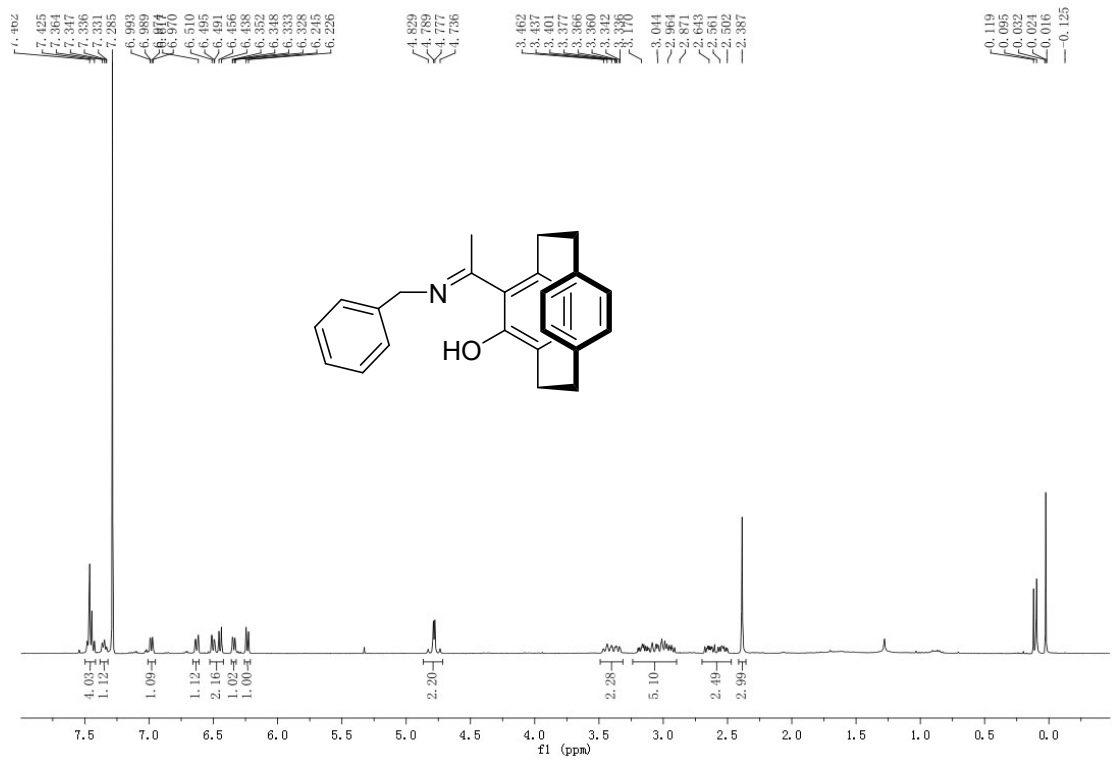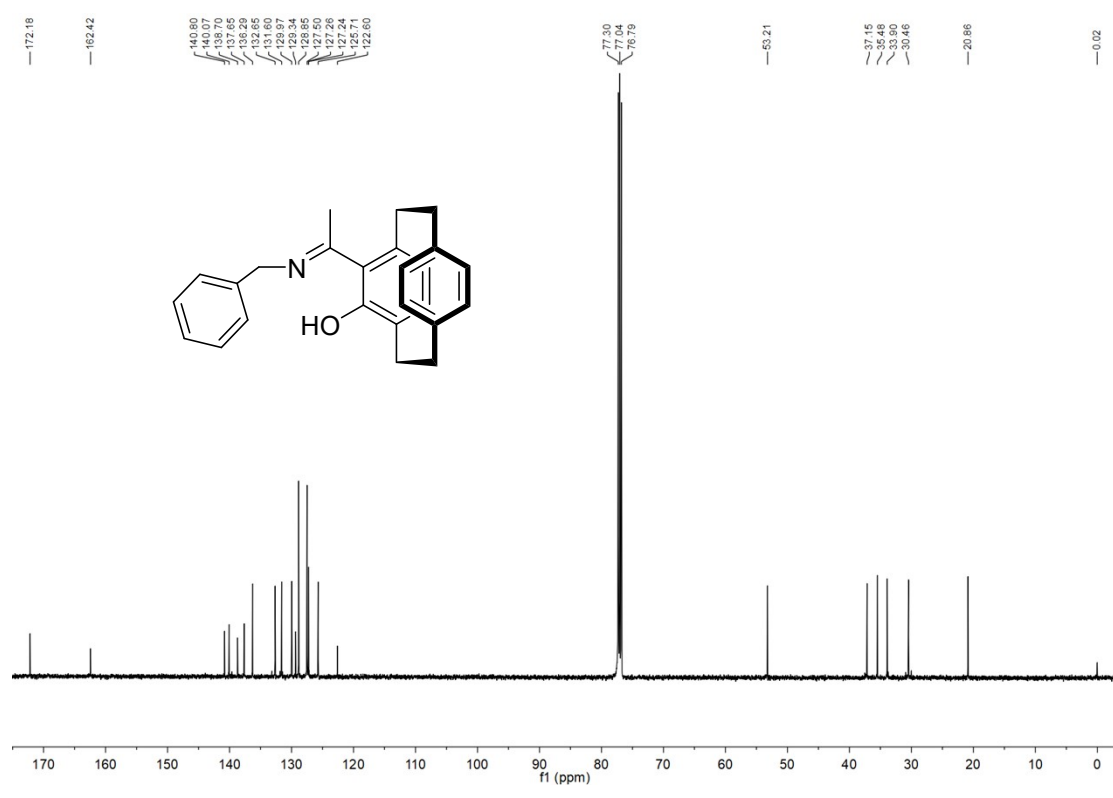



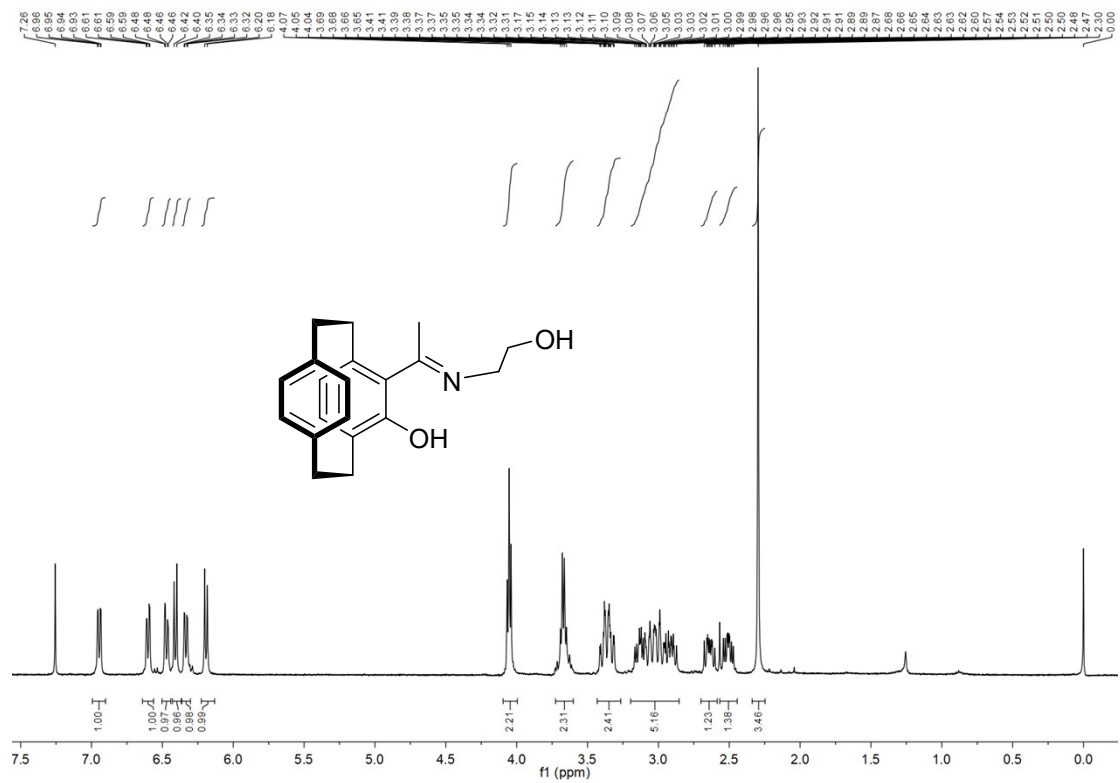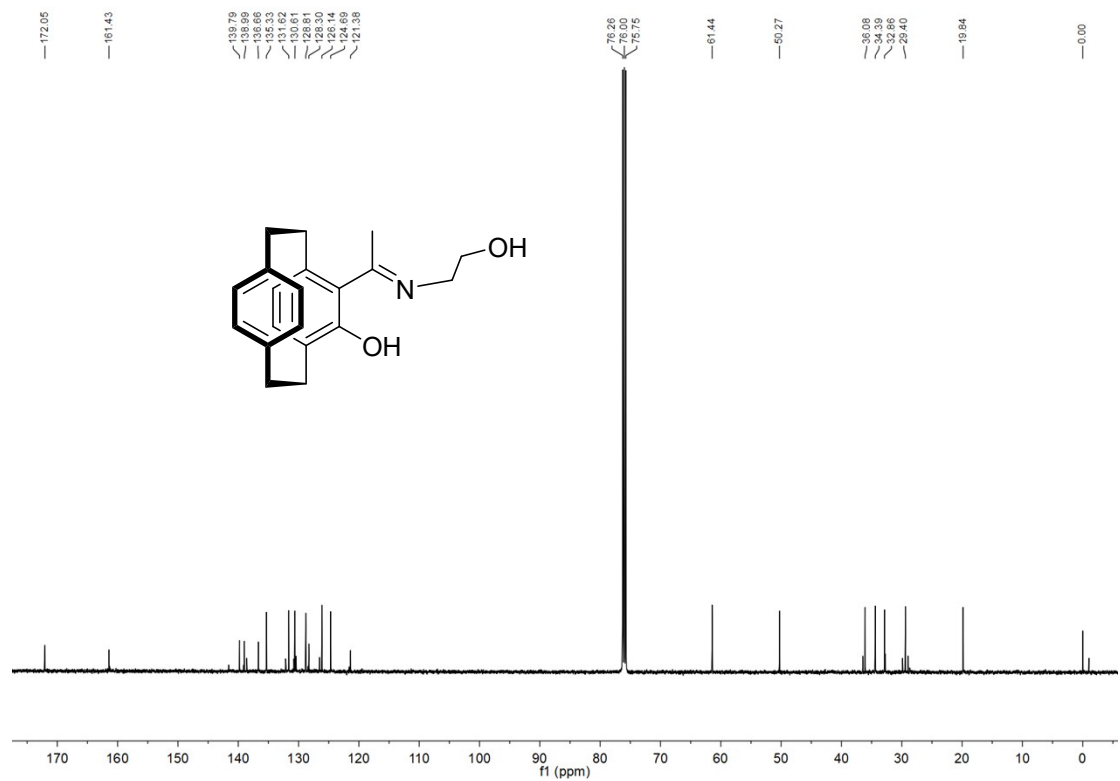

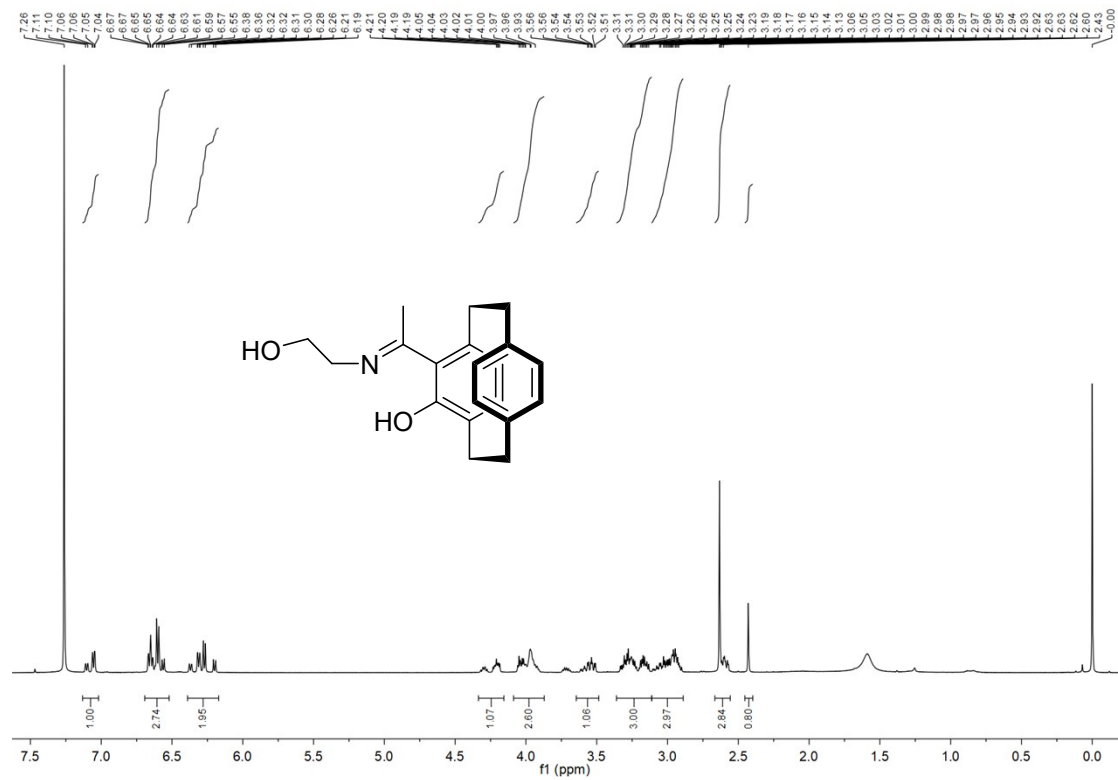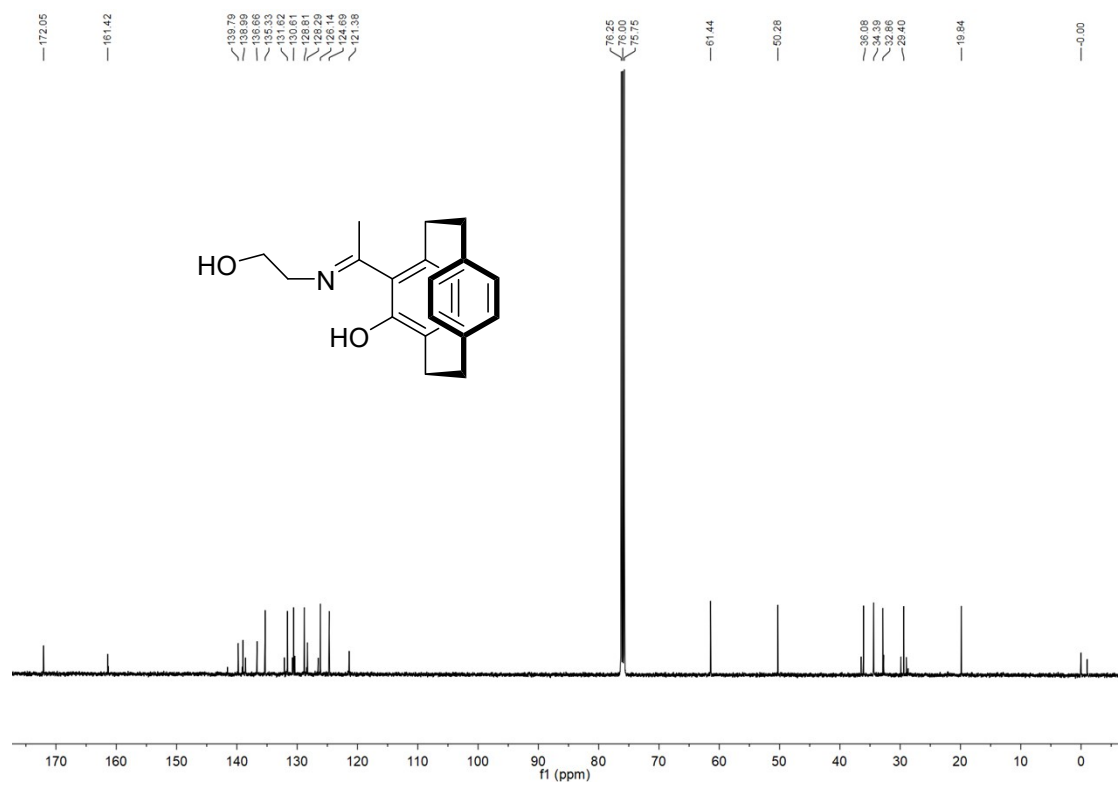

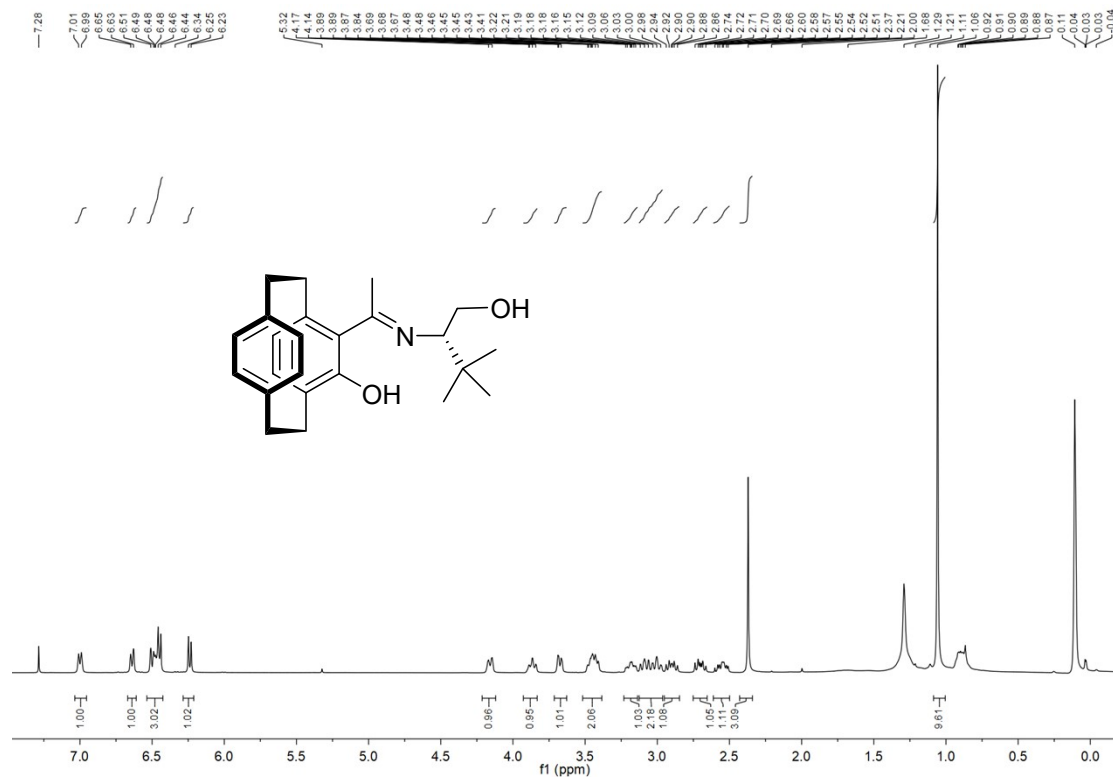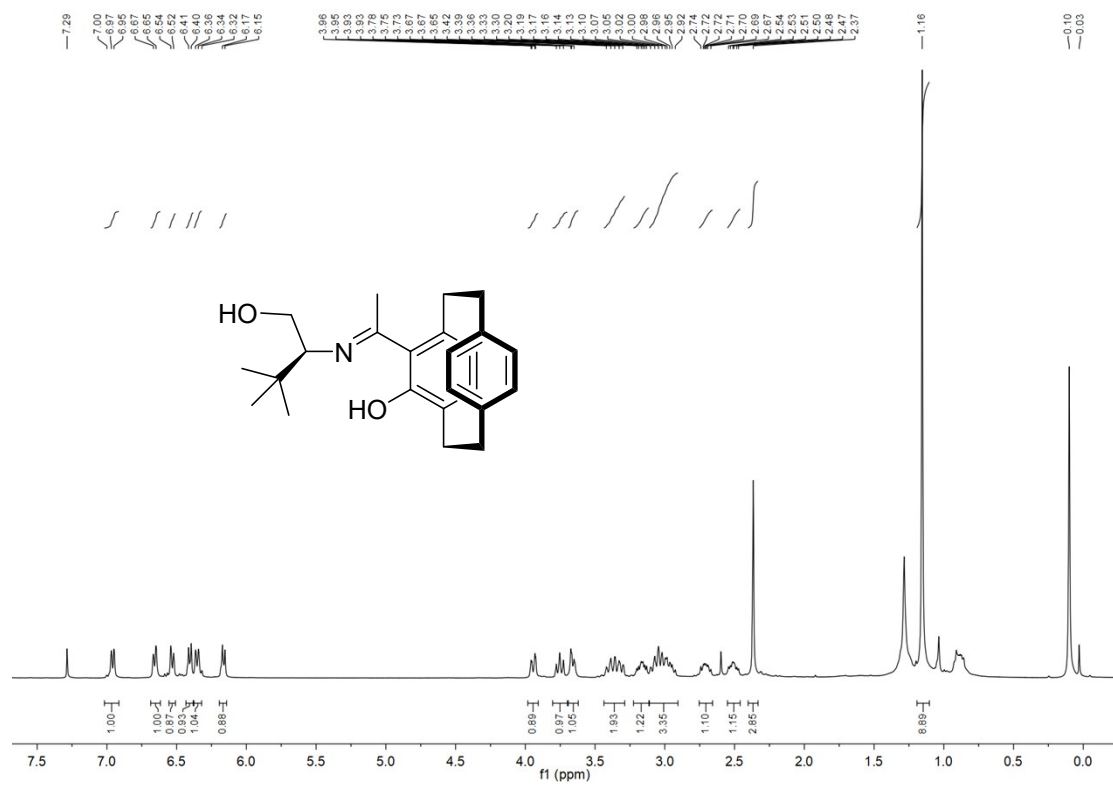

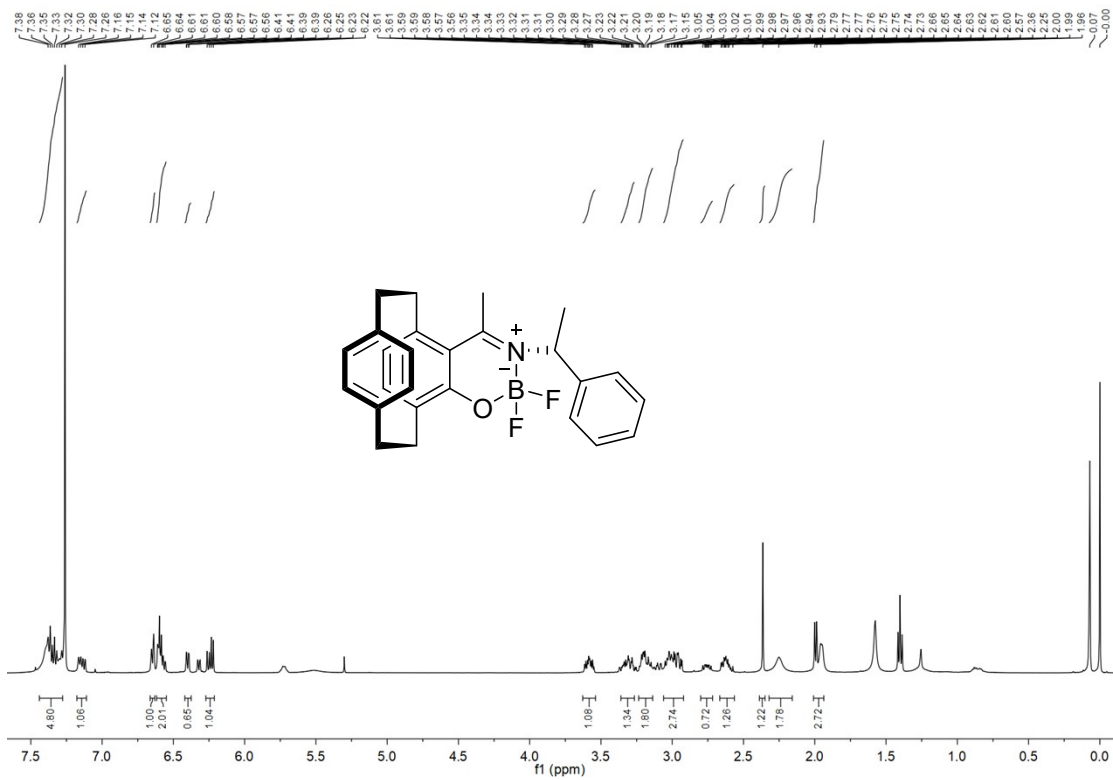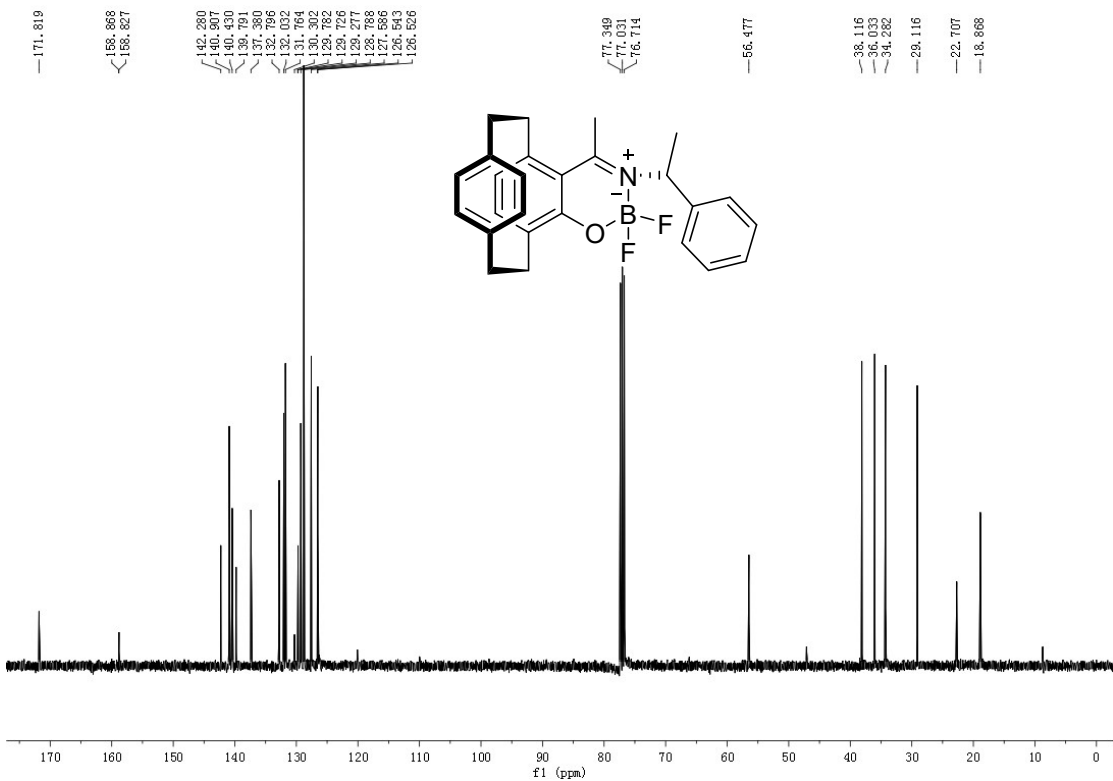

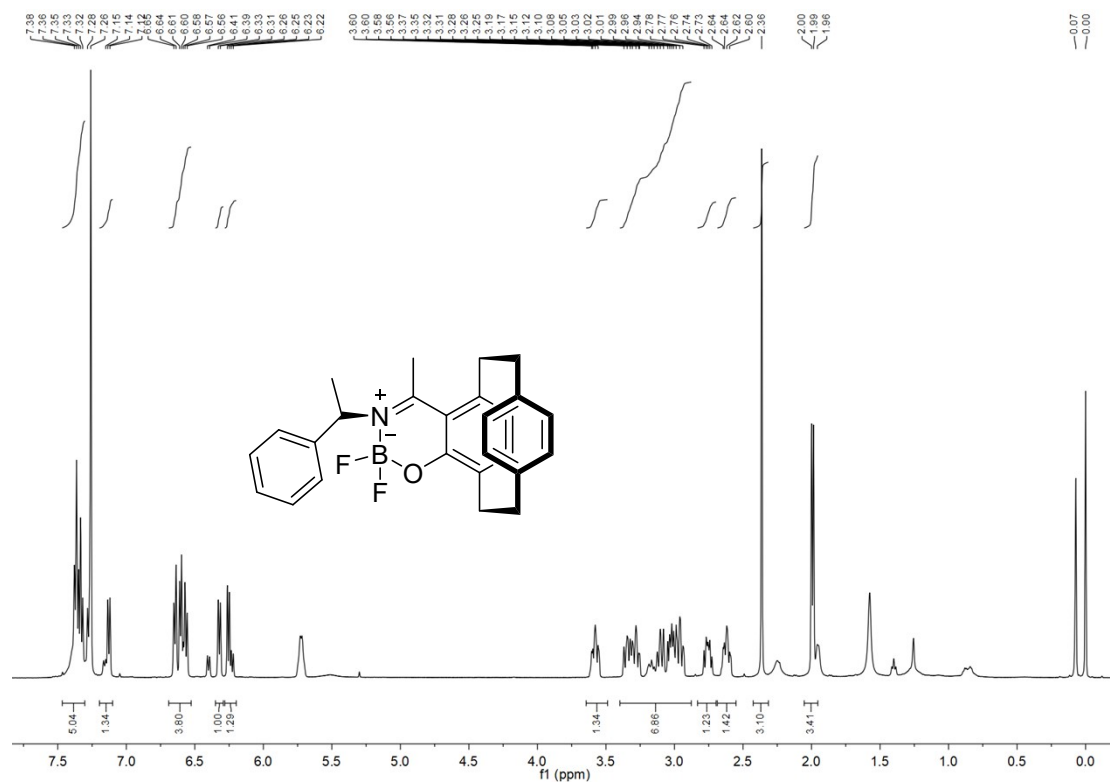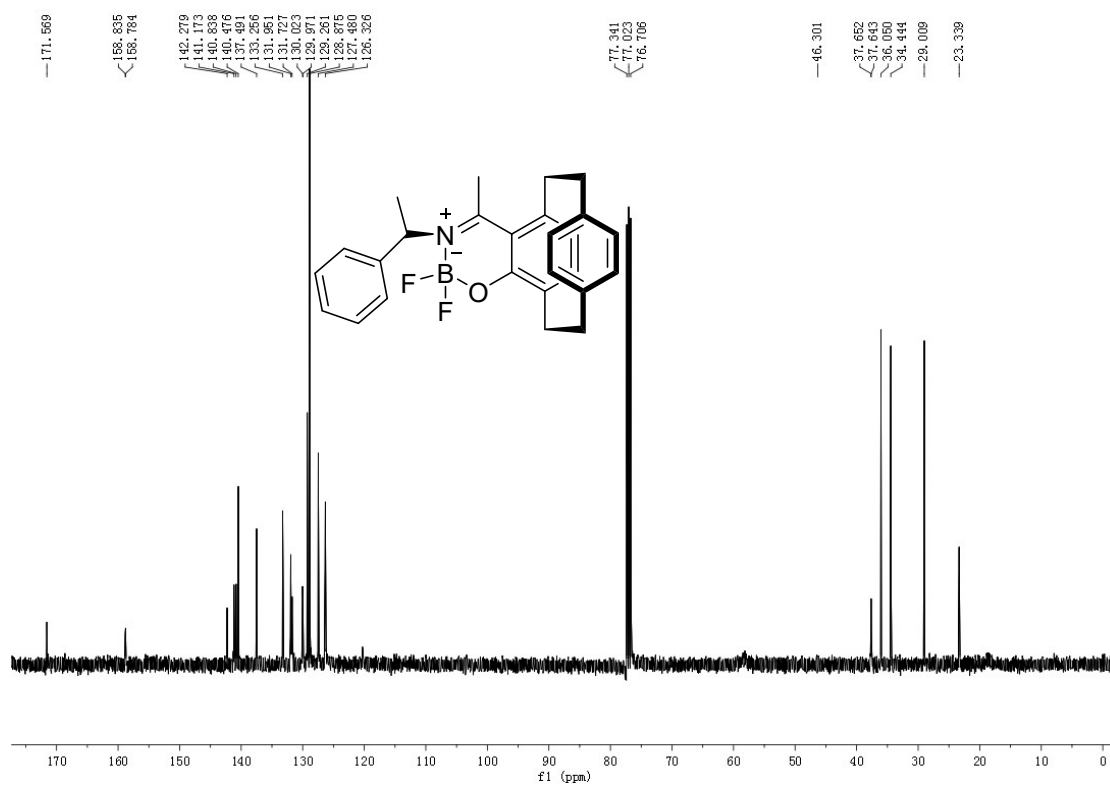

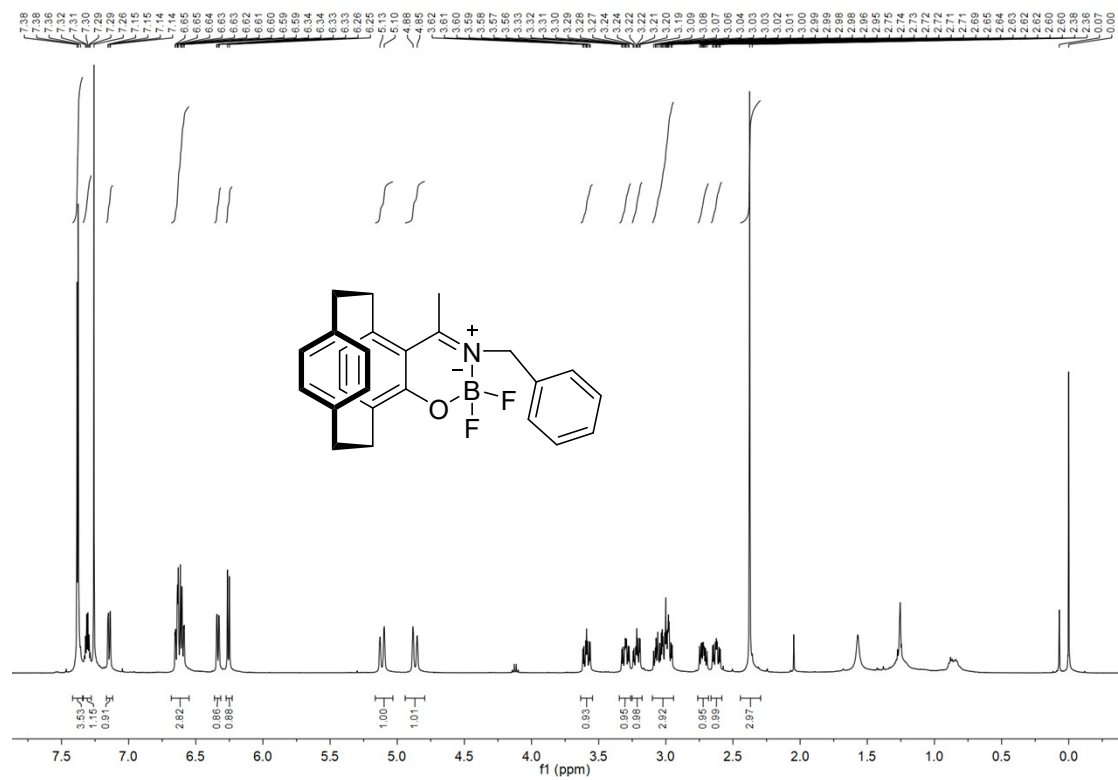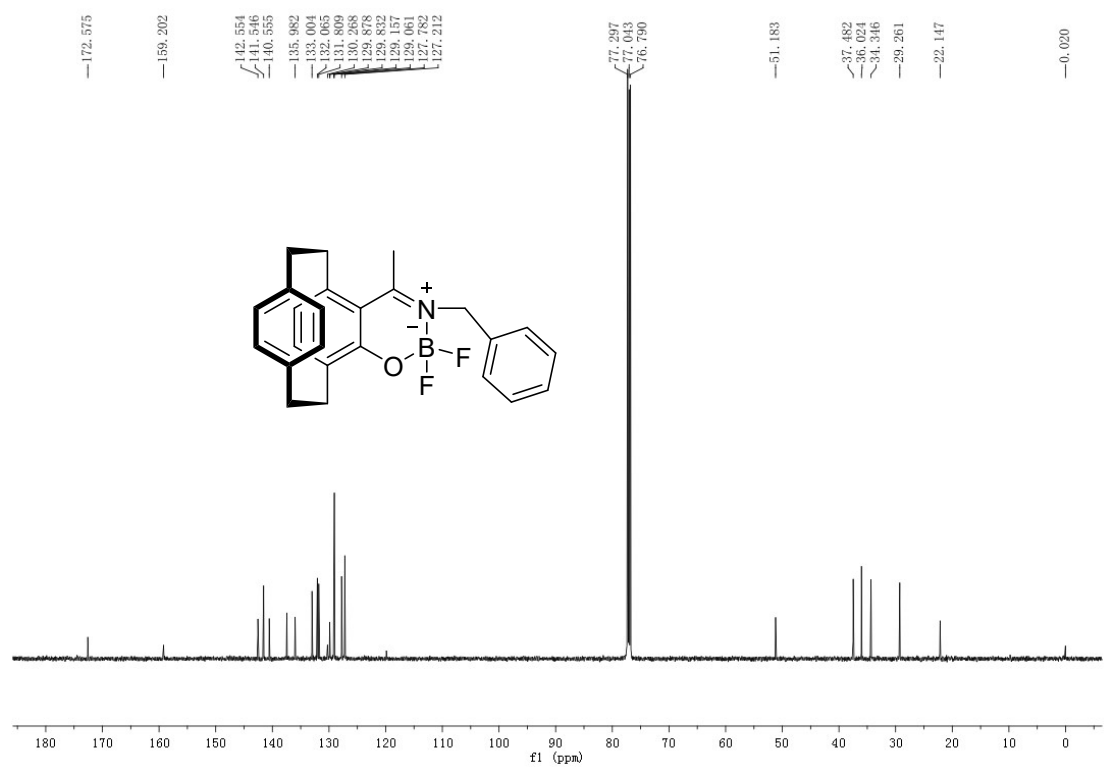

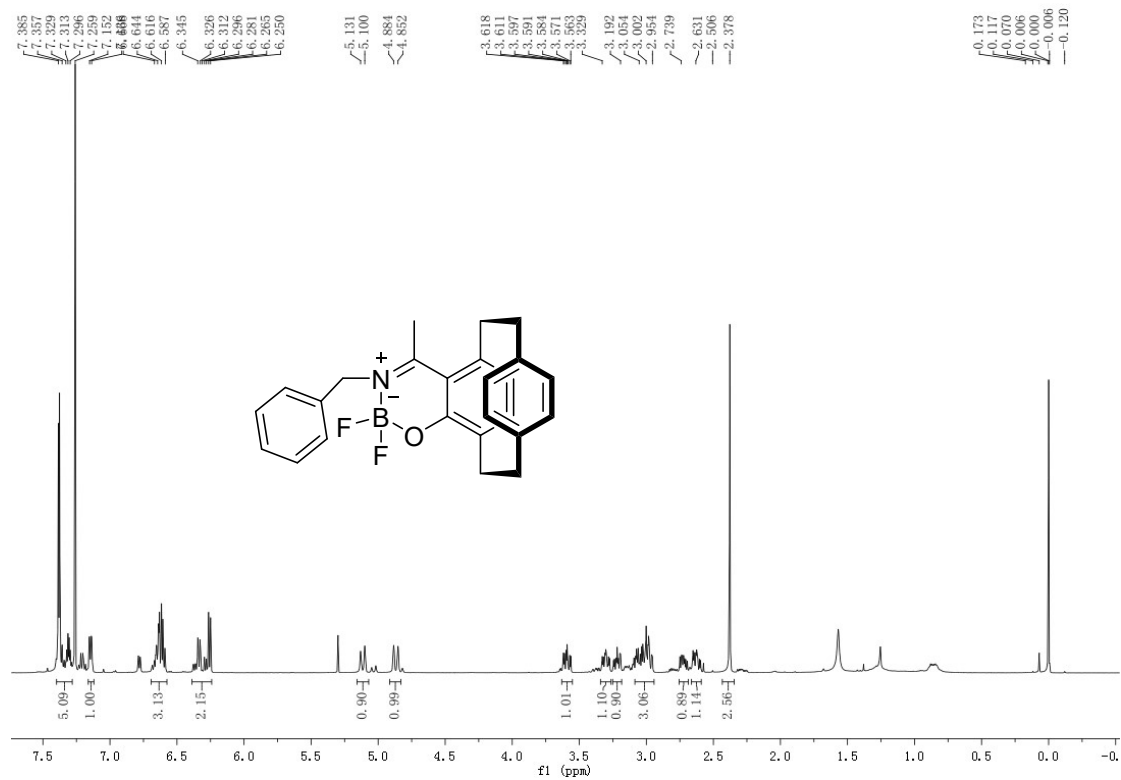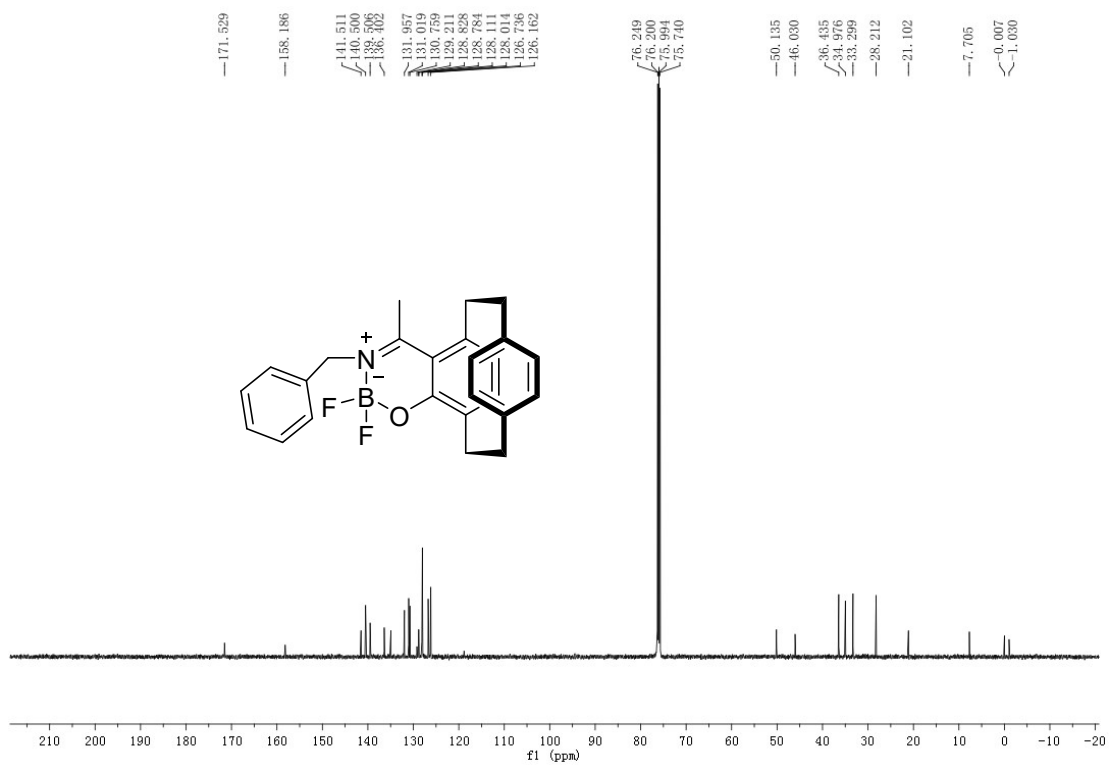

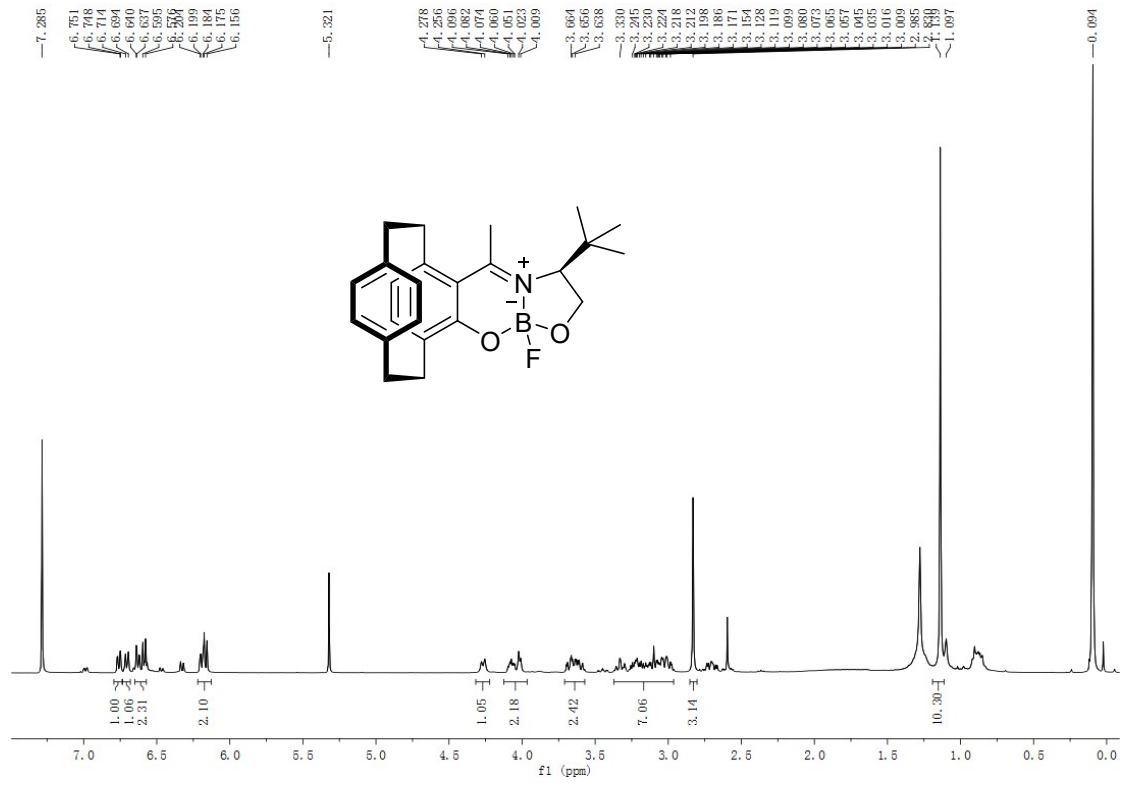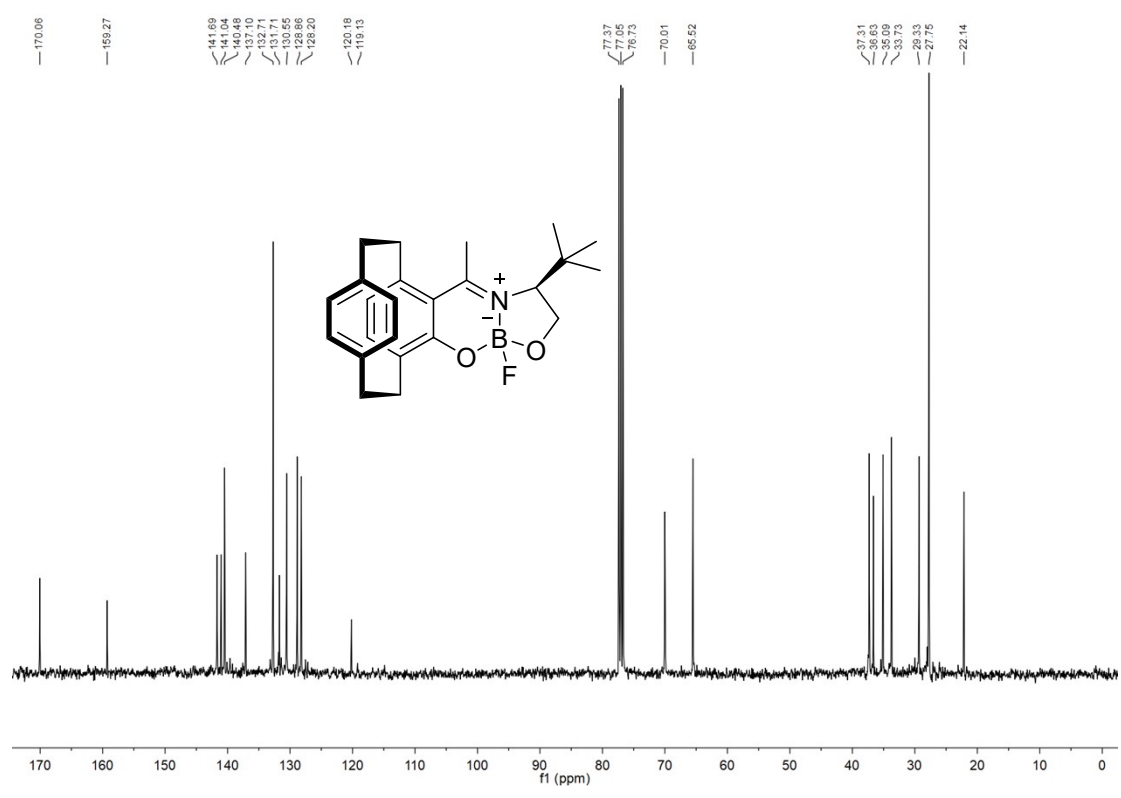



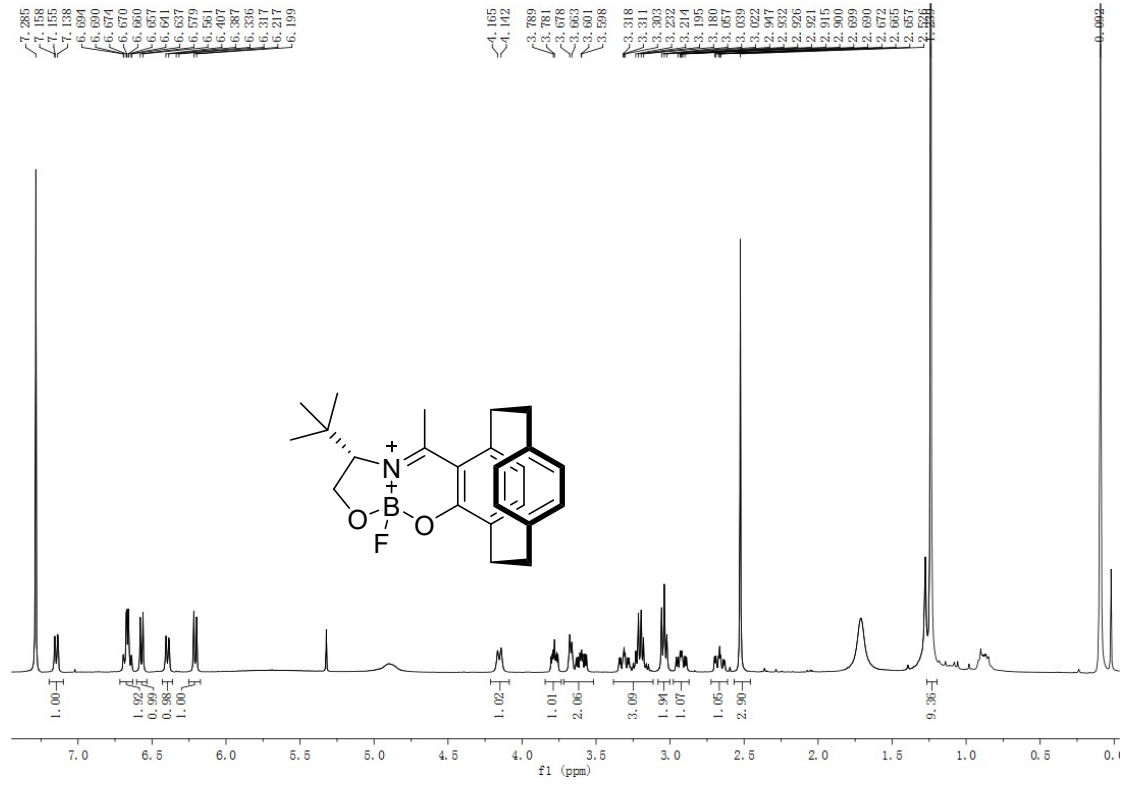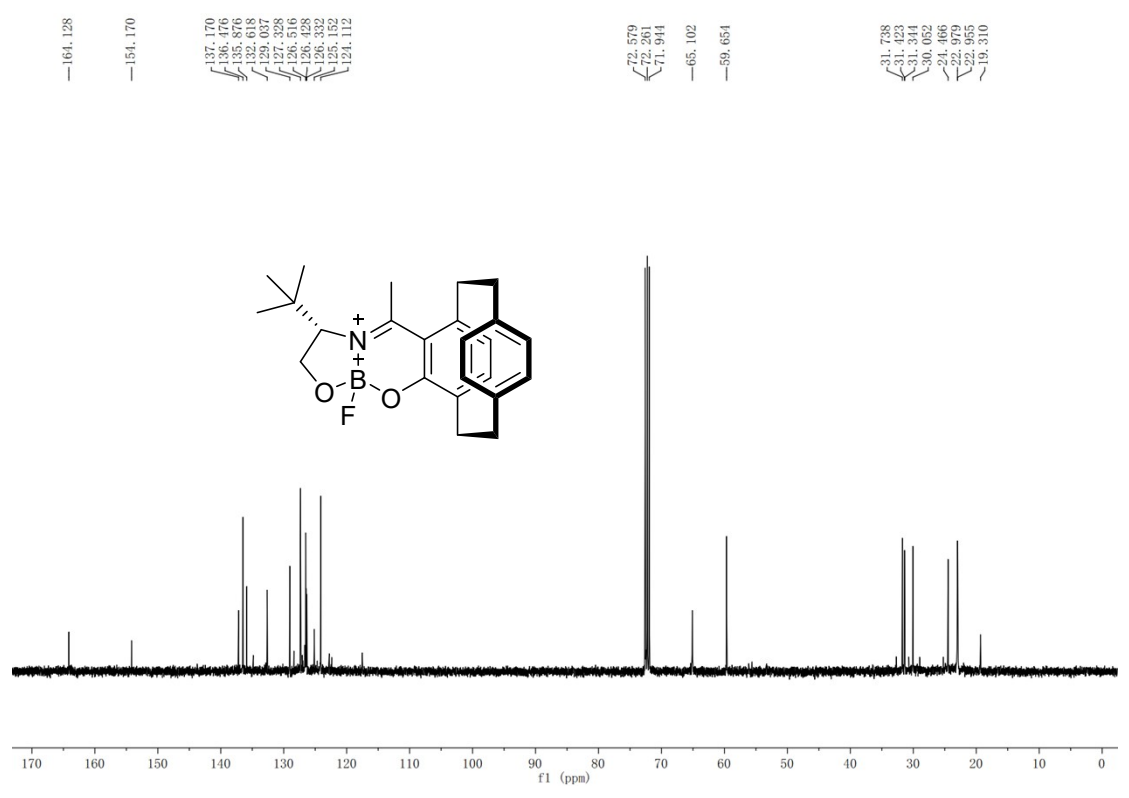

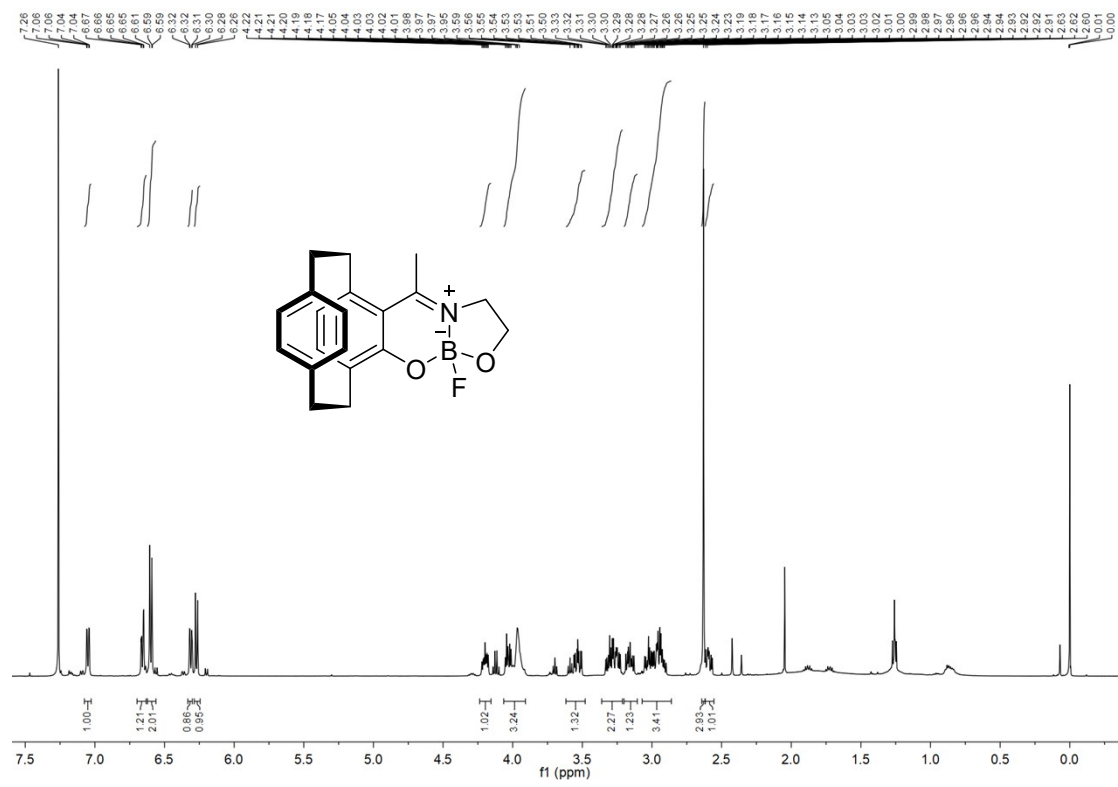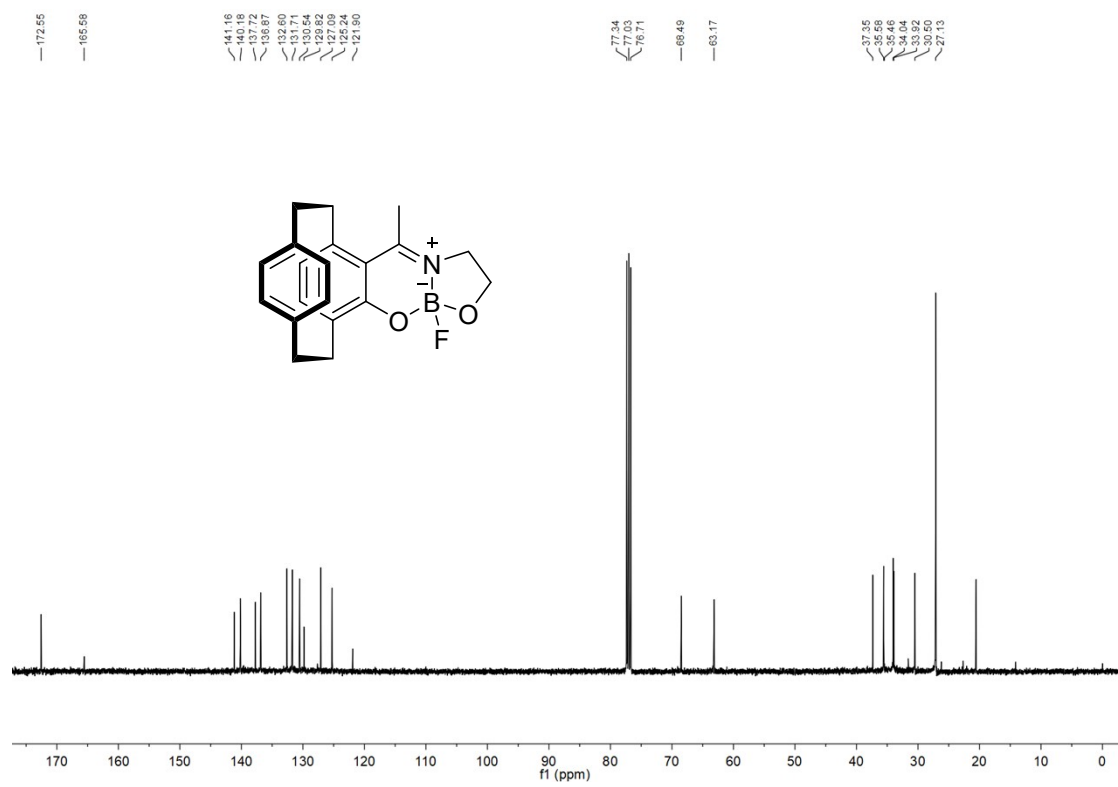

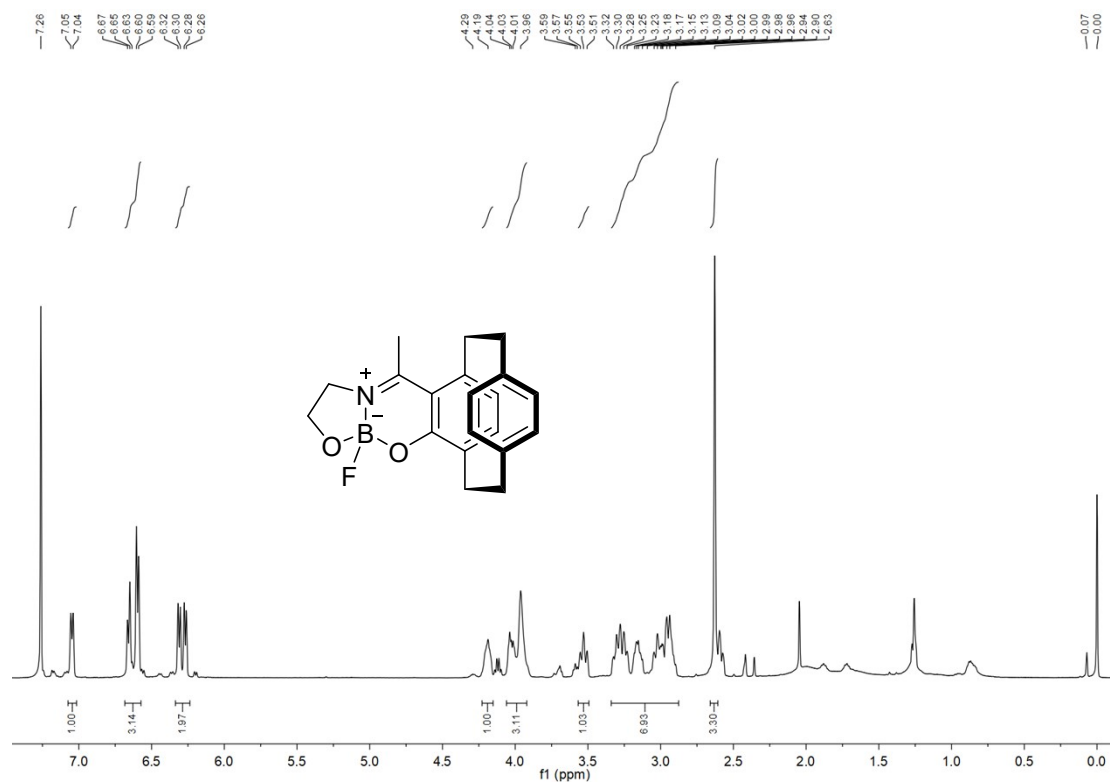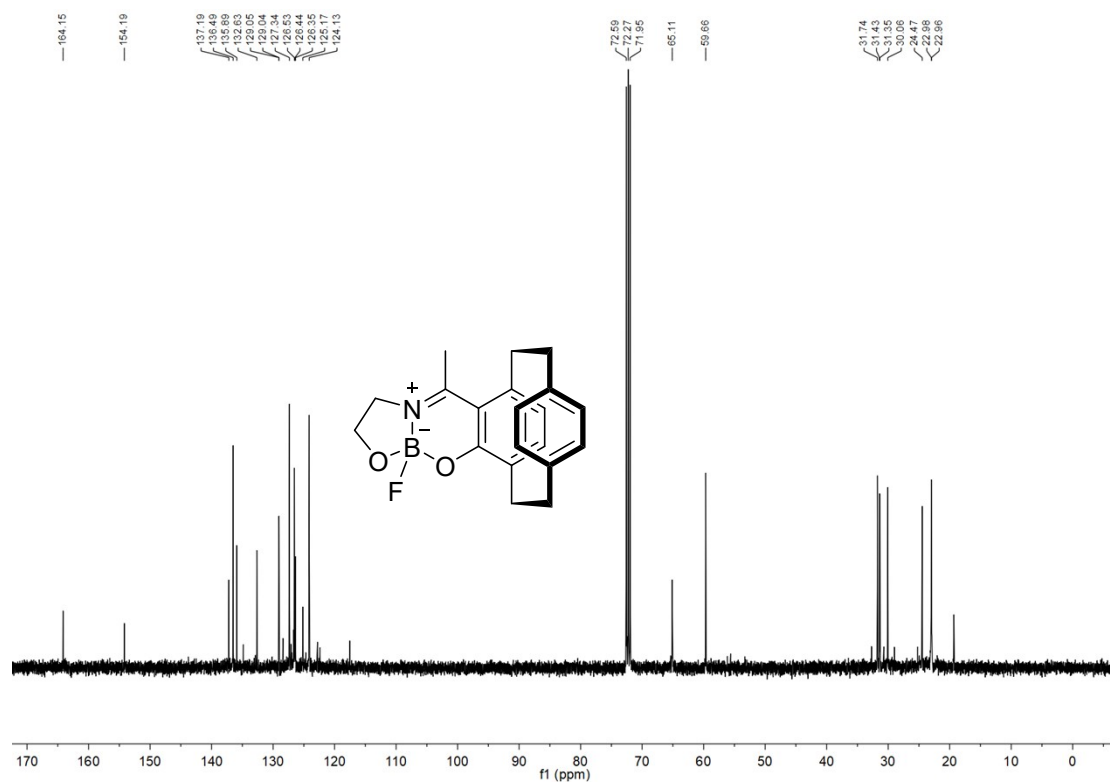

#### 4. Theoretical calculations

Optimized structure of (*S<sub>p</sub>*,*R*)-**3a** in the ground state

Symbolic Z-matrix:

Charge = 0 Multiplicity = 1

|   |         |        |         |
|---|---------|--------|---------|
| F | 0.7867  | 4.465  | 9.5908  |
| F | 1.8366  | 3.9971 | 7.6414  |
| O | 2.9758  | 3.6475 | 9.6065  |
| N | 2.5075  | 5.9498 | 8.8377  |
| C | 3.9689  | 4.1277 | 10.3679 |
| C | 1.2549  | 8.0949 | 8.515   |
| C | 3.537   | 6.3941 | 9.4966  |
| C | 5.1633  | 5.9728 | 11.4229 |
| C | 2.8184  | 3.1846 | 13.2051 |
| C | 3.0907  | 5.9699 | 13.3372 |
| C | 4.6739  | 3.1913 | 11.1609 |
| C | 3.6792  | 3.7742 | 14.1271 |
| H | 4.1739  | 3.2343 | 14.6996 |
| C | 0.6104  | 8.0691 | 9.7452  |
| H | 0.4372  | 7.2522 | 10.1564 |
| C | 5.9757  | 5.0326 | 11.9999 |
| H | 6.6981  | 5.3202 | 12.5108 |
| C | 4.2496  | 5.5094 | 10.4175 |
| C | 2.0597  | 5.388  | 12.6229 |
| H | 1.4508  | 5.9326 | 12.1769 |
| C | 1.9137  | 4.015  | 12.5561 |
| H | 1.208   | 3.6461 | 12.077  |
| C | 1.4712  | 9.3275 | 7.9111  |
| H | 1.888   | 9.3667 | 7.0801  |
| C | 1.6808  | 6.784  | 7.8903  |
| H | 0.8517  | 6.2795 | 7.7536  |
| C | 3.8124  | 5.151  | 14.2044 |
| H | 4.3827  | 5.5294 | 14.8337 |
| B | 2.0068  | 4.4755 | 8.9322  |
| C | 5.7639  | 3.6672 | 11.8535 |
| H | 6.3668  | 3.0671 | 12.2282 |
| C | 4.981   | 7.2808 | 12.1655 |
| H | 5.0158  | 8.0137 | 11.5291 |
| H | 5.7132  | 7.3945 | 12.7904 |
| C | 4.096   | 7.7796 | 9.2621  |
| H | 3.947   | 8.0338 | 8.3472  |
| H | 5.0378  | 7.7796 | 9.4458  |
| H | 3.6565  | 8.4045 | 9.8425  |
| C | 0.2186  | 9.2501 | 10.3719 |
| H | -0.2073 | 9.2243 | 11.198  |

|   |        |         |         |
|---|--------|---------|---------|
| C | 3.6104 | 7.3468  | 12.9556 |
| H | 3.7337 | 7.8732  | 13.7607 |
| H | 2.9485 | 7.7949  | 12.4052 |
| C | 4.099  | 1.8298  | 11.4218 |
| H | 4.8244 | 1.2058  | 11.5861 |
| H | 3.6225 | 1.5307  | 10.633  |
| C | 2.3373 | 6.8652  | 6.5116  |
| H | 3.1815 | 7.3162  | 6.5836  |
| H | 1.7655 | 7.3515  | 5.9129  |
| H | 2.4765 | 5.9785  | 6.1726  |
| C | 3.1028 | 1.8087  | 12.6706 |
| H | 2.2677 | 1.3931  | 12.4023 |
| H | 3.4909 | 1.2679  | 13.3754 |
| C | 1.0718 | 10.4999 | 8.5364  |
| H | 1.2171 | 11.3178 | 8.1189  |
| C | 0.4697 | 10.4626 | 9.7549  |
| H | 0.2254 | 11.2557 | 10.1764 |

Optimized structure of ( $R_p$ )-**3b** in the ground state

Symbolic Z-matrix:

Charge = 0 Multiplicity = 1

|   |         |         |         |
|---|---------|---------|---------|
| F | 9.6479  | 9.9939  | 8.3205  |
| F | 8.3706  | 8.1386  | 8.1664  |
| N | 10.3446 | 8.0287  | 9.5075  |
| O | 8.3932  | 9.3981  | 10.1312 |
| B | 9.1468  | 8.9029  | 9.0222  |
| C | 5.4422  | 6.9294  | 12.6556 |
| H | 4.82    | 7.1715  | 13.3028 |
| C | 6.3175  | 5.8814  | 12.9002 |
| H | 6.2887  | 5.4338  | 13.7152 |
| C | 7.2325  | 5.5019  | 11.9363 |
| C | 7.0687  | 6.0063  | 10.662  |
| H | 7.553   | 5.6381  | 9.9585  |
| C | 6.1994  | 7.0479  | 10.4133 |
| H | 6.0922  | 7.3669  | 9.5462  |
| C | 5.4879  | 7.6179  | 11.4541 |
| C | 5.078   | 9.0693  | 11.3994 |
| H | 4.3149  | 9.2055  | 11.9832 |
| H | 4.8011  | 9.2862  | 10.4954 |
| C | 6.2351  | 10.0441 | 11.8311 |
| H | 6.4584  | 10.6191 | 11.0825 |
| H | 5.9195  | 10.6078 | 12.5541 |
| C | 7.4776  | 9.3227  | 12.2805 |
| C | 7.6423  | 8.8802  | 13.5682 |

|   |         |        |         |
|---|---------|--------|---------|
| H | 7.1858  | 9.3114 | 14.2537 |
| C | 8.464   | 7.8121 | 13.8805 |
| H | 8.4968  | 7.5094 | 14.7599 |
| C | 9.2361  | 7.1866 | 12.9291 |
| C | 9.378   | 7.8613 | 11.6784 |
| C | 8.4372  | 8.8629 | 11.3511 |
| C | 9.503   | 5.7036 | 13.1152 |
| H | 9.4296  | 5.4842 | 14.0581 |
| H | 10.4111 | 5.5082 | 12.8355 |
| C | 8.5236  | 4.8171 | 12.3131 |
| H | 8.9662  | 4.5208 | 11.5013 |
| H | 8.3161  | 4.029  | 12.8387 |
| C | 10.4359 | 7.57   | 10.7281 |
| C | 11.6644 | 6.8398 | 11.1714 |
| H | 11.593  | 5.9142 | 10.9288 |
| H | 11.7537 | 6.9142 | 12.1255 |
| H | 12.4355 | 7.2244 | 10.7477 |
| C | 11.3945 | 7.7566 | 8.5031  |
| H | 12.2539 | 8.0151 | 8.8718  |
| H | 11.2318 | 8.3102 | 7.7236  |
| C | 11.467  | 6.314  | 8.0685  |
| C | 10.417  | 5.4413 | 8.2083  |
| H | 9.6271  | 5.7314 | 8.6033  |
| C | 10.5202 | 4.1274 | 7.7652  |
| H | 9.8117  | 3.5359 | 7.8853  |
| C | 11.6694 | 3.7074 | 7.1497  |
| H | 11.7438 | 2.8323 | 6.8471  |
| C | 12.6975 | 4.5725 | 6.9829  |
| H | 13.4676 | 4.29   | 6.5463  |
| C | 12.6171 | 5.8625 | 7.4503  |
| H | 13.3425 | 6.4363 | 7.35    |

Optimized structure of ( $S_p$ )-**3b** in the ground state

Symbolic Z-matrix:

Charge = 0 Multiplicity = 1

|   |         |        |         |
|---|---------|--------|---------|
| F | 3.4033  | 4.4716 | 8.1712  |
| F | 4.6839  | 2.6188 | 8.3231  |
| N | 5.3773  | 4.5789 | 9.511   |
| O | 3.4301  | 3.2148 | 10.128  |
| B | 4.179   | 3.6957 | 9.0148  |
| C | 1.349   | 6.7239 | 12.9061 |
| H | 1.3232  | 7.1667 | 13.7228 |
| C | 0.4781  | 5.6779 | 12.6602 |
| H | -0.1438 | 5.4344 | 13.3071 |
| C | 0.5227  | 4.9927 | 11.4586 |

|   |         |        |         |
|---|---------|--------|---------|
| C | 1.23    | 5.5643 | 10.4122 |
| H | 1.1179  | 5.2489 | 9.5453  |
| C | 2.1029  | 6.609  | 10.6661 |
| H | 2.5899  | 6.9762 | 9.9642  |
| C | 2.2616  | 7.1112 | 11.9341 |
| C | 3.56    | 7.8014 | 12.3222 |
| H | 3.3497  | 8.5824 | 12.8575 |
| H | 4.0044  | 8.108  | 11.5168 |
| C | 4.5321  | 6.9018 | 13.1147 |
| H | 5.4397  | 7.0986 | 12.8333 |
| H | 4.4617  | 7.1188 | 14.0576 |
| C | 4.2713  | 5.4192 | 12.9319 |
| C | 4.4062  | 4.748  | 11.6834 |
| C | 3.4708  | 3.7537 | 11.3486 |
| C | 2.5215  | 3.2906 | 12.2818 |
| C | 2.6762  | 3.7297 | 13.5724 |
| H | 2.217   | 3.297  | 14.2565 |
| C | 3.4975  | 4.7959 | 13.8829 |
| H | 3.5293  | 5.1013 | 14.7611 |
| C | 1.2707  | 2.5689 | 11.837  |
| H | 0.9562  | 2.0087 | 12.5632 |
| H | 1.4899  | 1.9898 | 11.0898 |
| C | 0.1061  | 3.548  | 11.402  |
| H | -0.1686 | 3.331  | 10.4963 |
| H | -0.6567 | 3.413  | 11.9842 |
| C | 5.4725  | 5.047  | 10.7356 |
| C | 6.7064  | 5.775  | 11.1691 |
| H | 7.4772  | 5.3675 | 10.7664 |
| H | 6.7848  | 5.7309 | 12.1249 |
| H | 6.6499  | 6.6923 | 10.8941 |
| C | 6.4337  | 4.8502 | 8.4989  |
| H | 6.267   | 4.3013 | 7.7178  |
| H | 7.2927  | 4.5877 | 8.866   |
| C | 6.5081  | 6.2999 | 8.0719  |
| C | 5.4467  | 7.173  | 8.2143  |
| H | 4.6561  | 6.8791 | 8.6073  |
| C | 5.5489  | 8.4752 | 7.776   |
| H | 4.8386  | 9.0619 | 7.9037  |
| C | 6.6935  | 8.918  | 7.1517  |
| H | 6.761   | 9.7962 | 6.8541  |
| C | 7.7261  | 8.0449 | 6.9803  |
| H | 8.4929  | 8.3238 | 6.5323  |
| C | 7.6508  | 6.7529 | 7.4574  |
| H | 8.3798  | 6.1838 | 7.3636  |

Optimized structure of ( $R_p,S$ )-**3c** in the ground state

Symbolic Z-matrix:

Charge = 0 Multiplicity = 1

|   |         |         |        |
|---|---------|---------|--------|
| N | 4.9743  | 8.3511  | 3.5657 |
| F | 4.9428  | 10.5371 | 4.6389 |
| O | 4.6323  | 8.6815  | 5.9776 |
| O | 6.7438  | 9.0686  | 4.8728 |
| C | 3.3556  | 8.2321  | 5.8337 |
| B | 5.3152  | 9.228   | 4.8048 |
| C | 3.8224  | 7.6798  | 3.5009 |
| C | 1.4736  | 7.5181  | 4.4682 |
| C | 2.5524  | 8.2598  | 6.9749 |
| C | 1.3341  | 7.6509  | 6.8516 |
| H | 0.8549  | 7.4672  | 7.6261 |
| C | 0.7717  | 7.2951  | 5.6378 |
| H | -0.0731 | 6.9069  | 5.6109 |
| C | 2.8494  | 7.8358  | 4.5804 |
| C | 2.1249  | 11.0501 | 5.7689 |
| H | 2.9495  | 11.4567 | 5.9096 |
| C | 1.3026  | 10.7369 | 6.8627 |
| C | 6.4209  | 9.0559  | 1.6453 |
| C | 0.4781  | 10.1361 | 4.2643 |
| C | 0.0011  | 10.3811 | 6.5987 |
| H | -0.6153 | 10.3476 | 7.2941 |
| C | 7.1791  | 8.1108  | 3.9324 |
| H | 7.2421  | 7.2385  | 4.3528 |
| H | 8.0565  | 8.3511  | 3.5957 |
| C | 1.7087  | 10.7531 | 4.4808 |
| H | 2.252   | 10.968  | 3.7569 |
| C | 6.1712  | 8.0657  | 2.7817 |
| H | 6.1206  | 7.1564  | 2.4214 |
| C | 2.8415  | 9.1529  | 8.1634 |
| H | 3.7729  | 9.4256  | 8.1334 |
| H | 2.7088  | 8.6457  | 8.979  |
| C | 0.6648  | 7.8115  | 3.1863 |
| H | 1.1845  | 7.5365  | 2.415  |
| H | -0.1496 | 7.2835  | 3.1974 |
| C | -0.4038 | 10.0714 | 5.309  |
| H | -1.2846 | 9.8173  | 5.1525 |
| C | 3.5884  | 6.6342  | 2.4593 |
| H | 3.6863  | 7.0224  | 1.5869 |
| H | 2.7009  | 6.2806  | 2.5541 |
| H | 4.2274  | 5.9259  | 2.5668 |



|   |         |         |        |
|---|---------|---------|--------|
| C | 5.2139  | 9.1344  | 0.7318 |
| H | 5.0283  | 8.2633  | 0.3714 |
| H | 5.3961  | 9.7456  | 0.0142 |
| H | 4.4546  | 9.4429  | 1.2312 |
| C | 1.9202  | 10.4608 | 8.2093 |
| H | 1.2171  | 10.336  | 8.8652 |
| H | 2.4545  | 11.2222 | 8.4811 |
| C | 6.7831  | 10.477  | 2.0784 |
| H | 6.9755  | 11.0096 | 1.3024 |
| H | 7.556   | 10.4516 | 2.6474 |
| H | 6.0452  | 10.864  | 2.5573 |
| C | 0.2992  | 9.2858  | 3.0394 |
| H | 0.8381  | 9.6624  | 2.3265 |
| H | -0.6288 | 9.3436  | 2.7628 |
| C | 7.5863  | 8.492   | 0.8156 |
| H | 7.3647  | 7.6082  | 0.5137 |
| H | 8.3771  | 8.4562  | 1.3577 |
| H | 7.7427  | 9.0593  | 0.0569 |
